# Supplementary material for: Nocturnal aerosol optical depth measurements with modified skyradiometer POM-02 using the moon as a light source
Source: Copernicus journal article supplement (doi:10.5194/amt-2019-230), 2019-07-05
Supplement: Supplementary file [file amt-2019-230-AC5-supplement.pdf]

1 Title: Nocturnal aerosol optical depth measurements with modified skyradiometer  
2 POM-02 using the moon as a light source

3  
4 Authors:

5 Akihiro Uchiyama<sup>1</sup>, Masataka Shiobara<sup>2</sup>, Hiroshi Kobayashi<sup>3</sup>, Tsuneo Matsunaga<sup>1</sup>,  
6 Akihiro Yamazaki<sup>4</sup>, Kazunori Inei<sup>5</sup>, Kazuhiro Kawai<sup>5</sup>, and Yoshiaki Watanabe<sup>5</sup>

7  
8  
9 <sup>1</sup> Center for Global Environmental Research, National Institute for Environmental  
10 Studies, Tsukuba, Ibaraki 305-8506, Japan

11 <sup>2</sup> National Institute of Polar Research, Midoricho, Tachikawa, Tokyo 190-8518, Japan

12 <sup>3</sup> University of Yamanashi, Takeda, Kofu, Yamanashi 400-8510, Japan

13 <sup>4</sup> Meteorological Research Institute, Japan Meteorological Agency, Tsukuba, Ibaraki  
14 305-0052, Japan

15 <sup>5</sup> Prede Co., Ltd., Kamidaira, Fussa, Tokyo 197-0012, Japan

16  
17  
18 Correspondence to: Uchiyama Akihiro (uchiyama.akihiro@nies.go.jp)

19  
20 **Abstract**

21 The majority of aerosol data are obtained from daytime measurements, and there are  
22 few datasets available for studying nighttime aerosol characteristics. In order to  
23 estimate the aerosol optical depth (AOD) and the precipitable water vapor (PWV)  
24 during the nighttime using the moon as a light source, a skyradiometer POM-02  
25 (Prede Ltd., Japan) was modified. The amplifier was adjusted so that POM-02 could  
26 measure lower levels of input irradiance. In order to track the moon based on the  
27 calculated values, a simplified formula was incorporated into the firmware. A new  
28 position sensor with a four-quadrant detector to adjust the tracking of the sun and  
29 moon was also developed.

30 The calibration constant, which is the sensor output for the extra-terrestrial solar  
31 and lunar irradiance at the mean earth-sun distance, was determined by using the  
32 Langley method. The measurements for the Langley calibration were conducted at  
33 the [National Oceanic and Atmospheric Administration/Mauna Loa Observatory](#)  
34 (NOAA/MLO) [from Sep. 28, 2017 to Nov. 7, 2017](#). By assuming that [the correct](#)  
35 [reflectance is proportional to the reflectance estimated by the Robotic Lunar](#)  
36 [Observatory \(ROLO\) irradiance model](#), the calibration constant for the lunar direct  
37 irradiance was successfully determined using the Langley method. The ratio of the

38 calibration constant for the moon to that for the sun was often greater than 1; the  
39 value of the ratio was 0.95 to 1.18 in the visible and near-infrared wavelength region.  
40 This indicates that the ROLO model often underestimates the reflectance. In  
41 addition, this ratio depended on the phase angle. In this study, this ratio was  
42 approximated by a quadratic equation of the phase angle. By using this  
43 approximation, the reflectance of the moon can be calculated to within an accuracy of  
44 1% or less.

45 In order to validate the estimates of the AOD and PWV, continuous measurements  
46 with POM-02 were conducted at the Japan Meteorological Agency/Meteorological  
47 Research Institute (JMA/MRI) from January 2018 to May 2018, and the AOD and  
48 PWV were estimated. The results were compared with the AOD and PWV obtained  
49 by independent methods. The AOD was compared with that estimated by the  
50 National Institute for Environmental Studies (NIES) High Spectral Resolution Lidar  
51 measurements (wavelength: 532 nm), and the PWV was compared with the PWV  
52 obtained from a radiosonde and the Global Positioning System. In addition, the  
53 continuity of the AOD (PWV) before and after sunrise and sunset in Tsukuba was  
54 examined, and the AOD (PWV) of AERONET and that of POM-02 at MLO were  
55 compared. In the results, the daytime and nighttime AOD (PWV) measurements are  
56 shown to be statistically almost equivalent. The AODs (PWVs) during the daytime  
57 and nighttime for POM-02 are presumed to have the same degree of precision and  
58 accuracy within the measurement uncertainty.

59

## 60 1. Introduction

61

62 Atmospheric aerosols are an important constituent of the atmosphere. Aerosols  
63 change the radiation budget directly by absorbing and scattering solar radiation and  
64 indirectly through their role as cloud condensation nuclei (CCNs), thereby increasing  
65 cloud reflectivity and lifetime (e.g., Ramanathan et al. 2001; Lohmann and Feichter  
66 2005). Aerosols also affect human health as one of the main components of air  
67 pollution (Dockery et al. 1993; WHO 2006, 2013).

68 Atmospheric aerosols have a large variability in time and space. Therefore,  
69 measurement networks covering an extensive area on the ground and from space  
70 have been developed and established to determine the spatiotemporal distribution of  
71 aerosols. Well-known ground-based networks include AERONET (AERosol RObotic  
72 NETwork) (Holben et al. 1998), SKYNET (Takamura et al. 2004), and PFR-GAW  
73 (Precision Filter Radiometer-Global Atmosphere Watch) (Wehrli 2005). These  
74 observation networks use passive radiometers which measure sunlight in the region

75 from the ultraviolet to shortwave infrared wavelengths and the column average  
76 effective aerosol characteristics such as aerosol optical depth (AOD) are retrieved.

77 Using lidar, which is an active remote sensing instrument, several networks have  
78 also been constructed: for example, the Micropulse Lidar Network (MPLNET) by  
79 NASA (National Aeronautics and Space Administration) (Welton et al. 2001; Levis et  
80 al. 2016), the European Aerosol Research Lidar Network (EARLINET) (Pappalardo  
81 et al. 2016) in Europe, the Asian Dust and aerosol lidar observation network  
82 (AD-Net) (Shimizu et al. 2017) in East Asia, and the Latin American Lidar Network  
83 (LALINET) (Guerrero-Rascado et al. 2016) in South America.

84 Several satellite programs provide aerosol optical depth data on a global scale: for  
85 example, the Moderate Resolution Imaging Spectroradiometer (MODIS) (Remer et al.  
86 2005), Multiangle Imaging Spectroradiometer (MISR) (Kahn et al. 2005),  
87 Geostationary Operational Environmental Satellite (GOES) Aerosol Smoke Product  
88 (Prados et al. 2007), Sea-viewing Wide Field-of-view Sensor (SeaWiFS) (Wang et al.  
89 2000), Advanced Himawari Imager (AHI) (Yoshida et al. 2018; Kikuchi et al. 2018),  
90 and Cloud-Aerosol Lidar and Infrared Pathfinder Satellite Observation (CALIPSO)  
91 (Winker et al. 2007).

92 With the exception of active sensor measurements such as lidar systems, to  
93 estimate aerosol characteristics, direct solar irradiance and scattered solar radiance  
94 measured with a passive sensor are required. Therefore, the majority of aerosol  
95 property data are obtained by daytime measurements, and there are few datasets of  
96 nighttime aerosol characteristics available.

97 To advance the understanding of the diurnal behavior of aerosols, and nocturnal  
98 mixing layer dynamics, nighttime continuous AOD measurements are necessary. In  
99 particular, in high latitude regions during the winter polar night, aerosol properties  
100 cannot be measured using sunlight, and this results in gaps in the long-term aerosol  
101 data. Such nocturnal aerosol data would also contribute to the understanding of  
102 aerosol transport to polar regions, the influence of aerosol on cloud formation, and  
103 the cloud effect on the radiation budget.

104 Lidar instruments can be used to obtain aerosol data during the night. However, in  
105 many cases, [lidar data retrieval requires some physical or mathematical constraints](#)  
106 [in inversion algorithms to allow the quantitative interpretation of the lidar](#)  
107 [backscatter signal \(Fernald 1984; Klett 1985\)](#). In order to improve the accuracy of the  
108 analysis, constraining of the AOD is necessary.

109 In order to measure the optical depth of aerosol at night, research has been  
110 conducted using the moon and stars as light sources (Herber et al. 2002; Esposito et  
111 al. 1998; Esposito et al. 2003; Pérez-Ramírez et al. 2008). Since the reflectivity of the

112 moon changes depending on the observation angle, the determination of the  
113 calibration coefficient is an important obstacle to overcome (Herber et al. 2002).  
114 Instruments for observing stars are large, expensive, and complicated to use due to  
115 the low level of incoming energy from stars. Therefore, stellar measurements are  
116 limited in use, and no large-scale observation network has been established.

117 The moon is a bright light source at night and the reflectance properties of the  
118 moon's surface are virtually invariant ( $<10^{-8}$  yr<sup>-1</sup>; Kieffer 1997). However, since the  
119 surface of the moon is not spatially uniform and has non-Lambertian reflectance, the  
120 brightness of the moon as seen by an observer on the earth varies depending on the  
121 relationship between the moon, the sun, and the observer, that is, the phase and the  
122 lunar libration. Therefore, it is difficult to use the moon as a light source.

123 However, starting from the 2000s, the quality of reflectance data for the moon has  
124 improved. The empirical model known as ROLO (Robotic Lunar Observatory) was  
125 developed by the United States Geological Survey (USGS) (Kieffer and Stone 2005).  
126 ROLO is a NASA-funded program aimed at using the moon for on-orbit calibration of  
127 Earth Observing System (EOS) satellite instruments. Furthermore, the Spectral  
128 Profiler (SP) onboard the Japanese Selenological and Engineering Explorer  
129 (SELENE, nicknamed Kaguya) measures lunar photometric properties in the region  
130 of visible, near-infrared, and shortwave infrared wavelengths (Yokota et al. 2011).  
131 These data made it possible to estimate the reflectance of the moon, and thus the  
132 moon can be used as a light source for aerosol optical depth estimation.

133 The Cimel sun photometer used in AERONET has been modified for lunar  
134 observation and the aerosol optical depth at night can be estimated (Berkoff et al.  
135 2011; Barreto et al. 2013, 2016, 2017). [In addition, a lunar photometer—the Moon  
136 Precision Filter Radiometer, LunarPFR \(Kouremeti et al. 2016\)—has been developed  
137 by the Physical Meteorological Observatory in Davos \(PMOD\), which serves as the  
138 World Radiation Center \(WRC\), based on the sun-PFR experience. Using these  
139 instruments and stellar photometers, a multi-instrument nocturnal intercomparison  
140 campaign was conducted to evaluate nighttime aerosol measurements and lunar  
141 irradiance models \(Barreto et al. 2019\).](#)

142 In SKYNET, the radiometers POM-01 and POM-02, manufactured by Prede Co.  
143 Ltd., Japan, are used. These radiometers are called 'sky radiometers', and measure  
144 both the solar direct irradiance and sky-radiances (Takamura et al. 2004). The sky  
145 radiometers POM-01 and POM-02 can measure solar direct irradiance and  
146 sky-radiances during the daytime and the measured data are used for estimating  
147 aerosol characteristics during the daytime (Takamura et al. 2004). In this study, we  
148 will aim to measure the optical depth of aerosol using the moon as a light source by

149 modifying POM-02.

150 In section 2, we describe our modification of the instrument. In section 3, the  
151 ROLO model is briefly explained. In section 4, we briefly describe the data used in  
152 this study. In section 5, the calibration method and corresponding results are  
153 described. In section 6, we show the results of comparing the aerosol optical depth  
154 and precipitable water vapor obtained by continuous observation with those obtained  
155 by other independent instruments. We also show the results of comparing the aerosol  
156 optical depth and precipitable water vapor before and after sunrise and sunset using  
157 the continuous observation data. Furthermore, we show the results of a comparison  
158 between the AERONET and POM-02 data during the period of the MLO calibration  
159 measurement.

160

## 161 2. Modification of instrument

162

163 In the modification of the POM-02 for solar observation, only the amplifier and the  
164 position sensor were changed. The other components, e.g., detectors, filters, and  
165 lenses, are not changed. Therefore, the magnitude of the solid view angle (field of  
166 view) for the new POM-02 is the same as in the non-modified POM-02.  
167 Measurements can still be obtained in the daytime using the modified POM-02.

168

### 169 2.1 Adjustment of Amplifier

170

171 The sky radiometer POM-02 is designed to measure the direct solar irradiance and  
172 the scattered sky radiance with a single radiometer. An example of the calibration  
173 constant, which is the sensor output for the extra-terrestrial solar irradiance at the  
174 mean earth-sun distance (1 astronomical unit (AU)) at the reference temperature, is  
175 shown in Table 1. The calibration constant is  $1.8 \times 10^{-5}$  to  $3.4 \times 10^{-4}$  A in the visible and  
176 near-infrared region, and  $7.9 \times 10^{-5}$  to  $1.3 \times 10^{-4}$  A in the short-wavelength infrared  
177 region. Figure 1 shows an example of measurements of scattered radiances in the  
178 visible and near-infrared wavelength region. The output for the scattered radiance  
179 from the sky is  $1 \times 10^{-7}$  to  $1 \times 10^{-10}$  A, and this value is  $1 \times 10^{-6}$  smaller than the output  
180 for the direct solar irradiance. The direct lunar irradiance is  $1 \times 10^{-5}$  as strong as the  
181 direct solar irradiance during a full moon, and  $1 \times 10^{-6}$  during a half-moon (Berkoff et  
182 al. 2011). From Table 1, the calibration constants at 340 and 380 nm are  $1.8 \times 10^{-5}$  and  
183  $1.9 \times 10^{-5}$  (about  $2 \times 10^{-5}$ ), respectively. Therefore, the output for the direct lunar  
184 irradiance during the half moon is about  $2 \times 10^{-5} \times 10^{-6} = 2 \times 10^{-11}$  in the 340 and 380  
185 nm channels. This is close to the detectable limits of the current POM-02. Without

186 modification, it is possible to measure the direct lunar irradiance with the current  
187 POM-02 except for wavelengths between 340 and 380 nm where the sensitivity of the  
188 detector is low and wavelengths of 1225, 1627, and 2200 nm with poor S/N.

189 Table 2 shows the measurement ranges before and after modification of POM-02.  
190 POM-02 measures input energy in seven ranges according to the magnitude of the  
191 input energy, and the measured value is digitized with 15 bits. After modification the  
192 measurement ranges are slightly expanded, and the measurement limit depends on  
193 the magnitude of the dark current and the magnitude of the noise. [The sensor output  
194 takes into account the magnification of the amplifier, and the same amplifier was  
195 used for both the solar and lunar measurements.](#)

196 The dark current of the detector in the visible and near-infrared region was about  
197  $5 \times 10^{-13}$  A, and the RMS of the random component of the noise was  $4 \times 10^{-14}$  A. In  
198 consideration of these values, the new POM-02 can use amplifiers for measurement  
199 ranges 1 to 7 and the minimum meaningful current is about  $4 \times 10^{-13}$  A ( $\sim \text{RMS} \times 10$ ) in  
200 the visible and near-infrared region. This value is smaller than the output for the  
201 direct solar irradiance by a factor of  $1 \times 10^{-8}$  to  $1 \times 10^{-9}$ .

202 The dark current of the detector in the shortwave infrared wavelength region was  
203 about  $1.5 \times 10^{-8}$  A, and the RMS of the random component of the noise was  $4 \times 10^{-11}$  A.  
204 [The measurement range is limited due to the large dark current.](#) The new POM-02  
205 can use amplifiers for measurement ranges 1 to 5 and the minimum meaningful  
206 current is about  $4 \times 10^{-10}$  A ( $\sim \text{RMS} \times 10$ ). This value and the magnitude of the  
207 measured value of the direct lunar irradiance are comparable. [Therefore, it is  
208 difficult to measure the direct lunar irradiance even with the new POM-02 in the  
209 shortwave infrared wavelength region.](#)

210

## 211 2.2 Sun and moon position sensor

212

213 [The tracking of the sun and the moon is based on the calculated position. The moon  
214 positions are calculated with the simplified formula in Nagasawa \(1981\). The  
215 necessary software is installed in the firmware of POM-02. Deviations may occur  
216 even if the instrument is pointed in the calculated direction due to errors in the moon  
217 position calculation, instrument installation errors, misalignment of the rotation  
218 axis, and so on. A position sensor is used to correct this deviation.](#)

219 A position sensor with a four-quadrant detector is used to adjust the tracking of the  
220 sun and the moon. In order to adjust the tracking of the moon, a position sensor  
221 incorporating a new electronic circuit to amplify the signal and new software to  
222 process the signal data were developed. The new position sensor can be used to track

223 both the sun and the moon.

224 When the input energy to the position sensor is small, it is difficult to adjust the  
225 tracking with the position sensor. The magnitude of the input energy to the position  
226 sensor varies depending on the lunar phase and the aerosol optical depth. It was  
227 confirmed that the function of the moon tracking adjustment works during the  
228 period of the full moon  $\pm$  about 90 degrees of the phase angle (half-moon).

229 Whether the position sensor can be used can be determined by a user-specified  
230 threshold value. That is, the position sensor can be deactivated when the input  
231 energy to the position sensor becomes less than the threshold value. For phase  
232 angles larger than the half-moon, the signal of the position sensor was small, and the  
233 position sensor was deactivated.

234 When the position sensor is not functioning, tracking is performed based on the  
235 calculated values. When comparing the moon position calculated by this simplified  
236 formula with that calculated using the NASA SPICE toolkit (Acton 1996), the  
237 difference in the zenith angle is less than 0.01 degrees, and the difference in the  
238 azimuth angle is less than 0.04 degrees. The center of the field of view has a flat  
239 region of  $\pm 0.5$  degrees; the flat region is  $\pm 0.25$  degrees in the solar disk scan. The  
240 apparent diameters of the sun and the moon are about 0.5 degrees. Since the  
241 calculation error of the moon position is less than 0.25 degrees, if the misalignment  
242 of the rotation axis is negligible and POM-02 is installed correctly, it is possible to  
243 track the moon using only the calculated positions. In fact, measurements could be  
244 made on the day of a full moon  $\pm$  10 days (phase angle about 120 degrees). Figure 2  
245 shows an example of the measurements on Oct. 14, 2017 at NOAA/MLO. In this  
246 example, the phase angle of the moon is from 117.6 to 118.0 degrees.

247

### 248 3. Robotic Lunar Observatory (ROLO) irradiance model

249

250 In order to estimate the aerosol optical thickness using the moon as a light source,  
251 measurement of the extra-terrestrial irradiance of the moon is necessary. In this  
252 study, a model known as the ROLO irradiance model (Kieffer and Stone 2005) was  
253 used. This model was developed at the U.S. Geological Survey (USGS) and is based  
254 on an extensive database of radiance images acquired by the ground-based ROLO  
255 over more than 8 years. ROLO is a NASA-funded program designed to use the moon  
256 for on-orbit calibration of Earth Observing System (EOS) satellite instruments. The  
257 empirical irradiance model was developed for 32 wavelengths from 350 to 2450 nm  
258 and has the same form for each wavelength. The average residual is less than 1%.  
259 The coefficients of the empirical formula were constrained and determined using

260 data with a phase angle between 1.55 and 97 degrees. The empirically derived  
 261 analytic form based on the primary geometric variables is as follows:

$$\begin{aligned}
 \ln A_k = & \sum_{i=0}^3 a_{ik} g^i + \sum_{j=1}^3 b_{jk} \Phi^{2j-1} + c_1 \phi + c_2 \theta + c_3 \Phi \phi + c_4 \Phi \theta \\
 & + d_{1k} e^{-g/p_1} + d_{2k} e^{-g/p_2} + d_{3k} \cos((g - p_3)/p_4)
 \end{aligned} \tag{1}$$

263 where  $A_k$  is the disk-equivalent reflectance,  $g$  is the absolute phase angle in  
 264 radians,  $\theta$  and  $\phi$  are the selenographic latitude and longitude of the observer in  
 265 degrees, and  $\Phi$  is the selenographic longitude of the sun in radians.

266 This formula must be used with caution. The equation in Kieffer and Stone (2005)  
 267 has well-known typographical errors. In eq. (1),  $\theta$  and  $\phi$  in the original expression  
 268 by Kieffer and Stone (2005) are exchanged. In addition, the units of the coefficients  
 269  $p_1$ ,  $p_2$ ,  $p_3$ , and  $p_4$  are degrees. Therefore, in order to make the dimensions the  
 270 same,  $g$  in the exponent and the cosine terms must be converted into units of  
 271 degrees.

272 The astronomical parameter was calculated using our own software developed  
 273 using the NASA SPICE toolkit; an observation geometry information system named  
 274 SPICE is offered by NASA's Navigation and Ancillary Information Facility (NAIF)  
 275 (Acton, 1996). SPICE is widely used in the NASA and international planetary  
 276 exploration communities (for more information about SPICE, refer to the NAIF  
 277 webpage at <http://naif.jpl.nasa.gov>).

278 In this study, only the values of the reflectance are used, and it is assumed that  
 279 there is an error in the ROLO reflectance and that the correct reflectance is  
 280 proportional to the ROLO reflectance. This indicates that the relative variation in  
 281 the ROLO reflectance is assumed to be correct. The reflectance values are not  
 282 converted to irradiance values by assuming the extra-terrestrial solar spectral  
 283 irradiance. The wavelength of POM-02 used in this study does not necessarily match  
 284 the wavelength of the ROLO model. Here, the reflectance at the wavelength of  
 285 POM-02 was calculated by linearly interpolating from the reflectance of the ROLO  
 286 model at two adjacent wavelengths. Information on the filters used in the ROLO  
 287 measurement was not available. Here, the wavelength is represented by the center  
 288 wavelength. In addition, the ROLO model does not have reflectance data for the  
 289 wavelength 340 nm. The reflectance at the wavelength 340 nm was obtained by  
 290 extrapolating linearly from the values at the two end wavelengths.

291

## 292 4. Data

### 293 4.1 Data for Langley calibration



294

295 The aerosol optical thickness is estimated by measuring the attenuation of the  
296 direct solar or lunar irradiance. Therefore, in order to estimate the aerosol optical  
297 thickness, the output of the instrument for the input irradiance at the top of the  
298 atmosphere is necessary. The determination of this constant is referred to as  
299 calibration, and the output of the instrument for the extra-terrestrial solar or lunar  
300 irradiance at the mean earth-sun distance (1 AU) at the reference temperature is  
301 called the calibration constant. In this study, the calibration constant was  
302 determined by the Langley method.

303 To calibrate the POM-02 by the Langley method, measurements were conducted  
304 at the NOAA Mauna Loa Observatory (MLO) during the period from Sep. 28, 2017 to  
305 Nov. 7, 2017; the full moon was on Oct. 4 and Nov. 3, 2017. The MLO (19.5362°N,  
306 155.5763°W) is located at an elevation of 3397.0 meters amsl on the northern slope of  
307 Mauna Loa, Island of Hawaii, Hawaii, USA. The atmospheric pressure is about 680  
308 hPa. The MLO is one of the most suitable places to obtain data for a Langley plot for  
309 the solar direct irradiance measurement (Shaw 1983). Though the air at MLO is  
310 highly transparent, it is affected in the late morning and afternoon hours by marine  
311 aerosol that reaches the observatory during the marine inversion boundary layer  
312 breakdown under solar heating (Shaw 1983; Perry et al. 1999). Therefore, using data  
313 taken in the morning is recommended (Shaw 1982; Dutton et al. 1994; Holben et al.  
314 1998).

315 However, during the nighttime, the upslope winds change to downslope winds,  
316 which bring low moisture and aerosol-poor air above the marine boundary layer  
317 down to the observatory. As a result, daytime orographic clouds at the observatory  
318 disappear and the atmosphere stratification becomes stable. These atmospheric  
319 conditions are suitable for obtaining data for the Langley plot from the lunar direct  
320 irradiance measurement.

321 During the calibration period, the data obtained for the moon over 18 nights for the  
322 visible and near-infrared region, and 13 nights for the short wavelength infrared  
323 region and water vapor channel (940 nm) were used to determine the calibration  
324 constants. The data obtained for the sun over 22 days for the visible, near-infrared,  
325 and short wavelength infrared region, and 24 days for the water vapor channel (940  
326 nm) were used to determine the calibration constants.

327

328 4.2 Continuous measurement for comparison

329

330 The measurements for the estimation of the aerosol optical depth and precipitable

331 water vapor were performed at 1-minute intervals at the Japan Meteorological  
 332 Agency/Meteorological Research Institute (JMA/MRI) (36.05°N, 140.13°E) in  
 333 Tsukuba, which is located about 50 km northeast of Tokyo. The comparison was  
 334 made using data obtained during the period from Jan. 1 to May 31, 2018. During this  
 335 period, the AOD and the precipitable water vapor (PWV) were estimated assuming  
 336 the calibration constant was unchanged.

337 The optical depth estimated from POM-02 was compared with the value of the  
 338 [National Institute for Environmental Studies](#) (NIES) High Spectral Resolution Lidar  
 339 (HSRL, wavelength; 532 nm). The NIES/HSRL is one of the lidar operated by the  
 340 lidar measurement group of the NIES (Shimizu et al. 2016). The NIES and MRI  
 341 observation sites are located about 800 m apart. Since the POM-02 was not  
 342 measured at the 532 nm wavelength, the AOD at 532 nm was interpolated from the  
 343 values of 500 nm and 675 nm by assuming that AOD is proportional to  $\lambda^{-\alpha}$ , where  
 344  $\lambda$  is the wavelength. Furthermore, since the AOD of NIES/HSRL is the 15-minute  
 345 average, the value of POM-02 was also averaged over 15 minutes.

346 The PWV estimated from POM-02 was compared with that obtained from the  
 347 vertical profile of a radiosonde and that obtained from the Global Positioning System  
 348 (GPS) receiver. The radiosonde observation is operated from the JMA Aerological  
 349 Observatory, which is adjacent to JMA/MRI. The GPS receiver is installed at  
 350 JMA/MRI, and GPS data were processed by one of the JMA/MRI researchers (Shoji  
 351 et al. 2013). The comparison of the PWV was performed using the 30-minute average  
 352 values.

353

## 354 5. Calibration of POM-02 using MLO data

### 355 5.1 [Langley method](#)

356

357 In this study, the calibration constant was determined by the Langley method  
 358 (Uchiyama et al. 2018). Here, we do not consider the temperature dependence of the  
 359 sensor output for the POM-02. Under these observation conditions in Tsukuba, the  
 360 temperature dependence of the sensor output can be ignored except for the 340, 380,  
 361 and 2200 nm channels (Uchiyama et al. 2018).

362 The sensor output when measuring the direct solar irradiance can be written as  
 363 follows:

$$364 \quad V(\lambda_0) = \frac{V_{s0}(\lambda_0)}{R_s^2} \exp(-m(\theta)\tau(\lambda_0)) \bar{T}_{gas}(\lambda_0, \theta) \quad (2)$$

365 where  $V(\lambda_0)$  is the sensor output in the  $\lambda_0$  wavelength channel,  $R_s$  is the  
 366 earth-sun distance in AU,  $m(\theta)$  is the total airmass,  $\tau(\lambda)$  is the total optical

367 depth,  $\theta$  is the solar zenith angle, and  $\bar{T}_{gas}(\lambda_0, \theta)$  is the channel average  
 368 transmittance of the gas line absorption. Furthermore,  $V_{s_0}(\lambda_0)$  is the sensor output  
 369 for the extra-terrestrial solar irradiance at 1 AU, and is called the calibration  
 370 constant.  $\tau(\lambda)$  consists of the optical thickness for molecular scattering (Rayleigh  
 371 scattering), aerosol, and the continuous absorption of gas. In this study, it is assumed  
 372 that airmass  $m(\theta)$  is the same for all components. The airmass  $m(\theta)$  for  
 373 molecular scattering is used (Schmid and Wehrli 1995; Holben et al. 1998).

374 In the case of no “gas absorption”, the following equation is used:

$$375 \quad V(\lambda_0) = \frac{V_{s_0}(\lambda_0)}{R_s^2} \exp(-m(\theta)\tau(\lambda_0)) \quad (3)$$

376 Taking the logarithm of the equation leads to

$$377 \quad \begin{aligned} \ln(V(\lambda_0)R_s^2) &= \ln V_{s_0}(\lambda_0) - m(\theta)\tau(\lambda_0) \\ &= C_1 m(\theta) + C_2 \end{aligned} \quad (4)$$

378 The parameters on the left-hand side are known:  $V$  is the measurement value, and  
 379  $R_s$  and  $m(\theta)$  can be calculated from the solar zenith angle. For example,  $R_s$  can  
 380 be calculated with the simplified formula in Nagasawa (1981), and  $m(\theta)$  can be  
 381 calculated as in Kasten and Young (1989). In the case of POM-02, the sensor output  
 382 is the current, and the unit of the measurements of  $V$  is the ampere A.  $C_2 = \ln V_{s_0}$   
 383 is determined from the ordinate intercept of a least-square fit when one plots the  
 384 left-hand side of the above equation versus airmass  $m(\theta)$ .

385 For the water vapor absorption band at a wavelength of 940 nm, the  
 386 Beer-Lambert-Bouguer law is not valid. Calibration methods for the 940 nm channel,  
 387 which is in the water vapor absorption band, have been considered extensively in  
 388 previous studies (Reagan et al. 1987a, 1987b, 1995; Bruegge et al. 1992; Thome et al.  
 389 1992, 1994; Michalsky et al. 1995, 2001; Schmid et al. 1996, 2001; Shiobara et al.  
 390 1996; Halthore et al. 1997; Cachorro et al. 1998; Plana-Fattori et al. 1998, 2004;  
 391 Ingold et al. 2000; Kiedron et al. 2001, 2003; Uchiyama et al. 2014, Campanelli et al.  
 392 2014).

393 In this study, the modified Langley method is used (Reagan et al. 1987a; Bruegge  
 394 et al. 1992; Schmid and Wehrli 1995). In the modified Langley method, the  
 395 transmittance is approximated by an empirical formula. The water vapor  
 396 transmittance is approximated as follows:

$$397 \quad Tr(\text{H}_2\text{O}) = \exp(-a(m(\theta) \cdot pwv)^b) \quad (5)$$

398 where  $a$  and  $b$  are fitting coefficients, and  $pwv$  is PWV.

399 Coefficients  $a$  and  $b$  were determined by computing the transmittance for several

400 atmospheric models (Uchiyama et al. 2014).

401 The output of the 940 nm channel can be written as follows:

$$\begin{aligned}
 V(\lambda_0) &= \frac{V_{S0}(\lambda_0)}{R_S^2} \exp(-m(\theta)\tau(\lambda_0)) Tr(\text{H}_2\text{O}) \\
 &= \frac{V_{S0}(\lambda_0)}{R_S^2} \exp(-m(\theta)\tau(\lambda_0)) \exp(-a(m(\theta) \cdot pwv)^b)
 \end{aligned}
 \tag{6}$$

403 Taking the logarithm of the equation leads to

$$\begin{aligned}
 \ln VR_S^2 + m(\theta)(\tau_{aer} + \tau_R) &= \ln V_{S0} - a(pwv)^b m(\theta)^b \\
 &= C_1' m(\theta)^b + C_2'
 \end{aligned}
 \tag{7}$$

405 In the same way as the normal Langley method, the parameters on the left-hand side  
 406 are known:  $V$  is the measurement value, and  $R$  and  $m(\theta)$  can be calculated from  
 407 the solar zenith angle.  $\tau_R$  is also estimated from the surface pressure; for example,  
 408  $\tau_R$  can be calculated as in Asano et al. (1983). In addition,  $\tau_{aer}$  is the aerosol optical  
 409 depth at the 940 nm wavelength, which is interpolated from the aerosol optical depth  
 410 from the values at the 870 and 1020 nm wavelengths.

411 If  $pwv$  is constant, then the right-hand side of the equation is a linear function of  
 412  $m(\theta)^b$ . Therefore, the values on the left-hand side can be fitted by a linear function  
 413 of  $m(\theta)^b$ , and the intersection of the y-axis and the fitted line is  $\ln V_{S0}$ .

414

## 415 5.2 Langley method for the moon

416

417 The sensor output when measuring the direct lunar irradiance can be written as  
 418 follows:

$$V(\lambda_0) = \frac{\tilde{A}_{ROLO}}{\pi} \Omega_M \frac{V_{S0}(\lambda_0)}{R_S^2} \cdot \frac{1}{R_m^2} \exp(-m(\theta)\tau(\lambda_0)) \bar{T}_{gas}(\lambda_0, \theta)
 \tag{8}$$

420 where  $\Omega_M$  is the solid angle of the moon,  $R_S$  is the distance between the moon  
 421 and the sun in AU, and  $R_m$  is the distance between the moon and the observer  
 422 normalized by 384,400 km (the mean radius of the moon's orbit around the earth).

423  $\tilde{A}_{ROLO}$  is the smoothed ROLO reflectance adjusted to the laboratory reflectance

424 spectra of the Apollo 16 samples.  $\tilde{A}_{ROLO}$  is calculated using the lunar reflectance

425  $A_{ROLO}$  with the ROLO irradiance model by the method shown in Kieffer and Stone

426 (2005) (see Appendix A).

427 Let  $\tilde{A}_{ROLO} = F_C A_{ROLO}$ , where  $F_C$  is a constant for smoothing (see Appendix A).

428 Using this equation, eq. (8) becomes

$$429 \quad V(\lambda_0) = \frac{F_C A_{ROLO}}{\pi} \Omega_M \frac{V_{S0}(\lambda_0)}{R_S^2} \cdot \frac{1}{R_m^2} \exp(-m(\theta)\tau(\lambda_0)) \bar{T}_{gas}(\lambda_0, \theta) \quad (9)$$

430 It is known that the aerosol optical depth retrieved using the ROLO reflectance  
 431 contains an error, which is dependent on the phase angle (Barreto et al. 2016, 2017,  
 432 2019, Juryšek and Prouza 2017). We assume that there is an error in the ROLO  
 433 reflectance and that the correct lunar reflectance is proportional to the ROLO  
 434 reflectance. This indicates that the relative variation in the ROLO model reflectance  
 435 is assumed to be correct. Let the proportional constant be denoted  $C'$ , and  $A_{ROLO}$   
 436 in eq. (9) be replaced with  $C' \cdot A_{ROLO}$ . Equation (9) then becomes

437

$$438 \quad \begin{aligned} V(\lambda_0) &= \frac{F_C C' A_{ROLO}}{\pi} \Omega_M \frac{V_{S0}(\lambda_0)}{R_S^2} \cdot \frac{1}{R_m^2} \exp(-m(\theta)\tau(\lambda_0)) \bar{T}_{gas}(\lambda_0, \theta) \\ &= \frac{C A_{ROLO}}{\pi} \Omega_M \frac{V_{S0}(\lambda_0)}{R_S^2} \cdot \frac{1}{R_m^2} \exp(-m(\theta)\tau(\lambda_0)) \bar{T}_{gas}(\lambda_0, \theta) \end{aligned} \quad (10)$$

439 where  $F_C C'$  is substituted with  $C$ .

440 In the case of no “gas absorption”, taking the logarithm of the equation leads to

$$441 \quad \begin{aligned} \ln\left(\frac{\pi V(\lambda_0)}{A_{ROLO} \Omega_M} R_S^2 R_m^2\right) &= \ln C V_{S0}(\lambda_0) - m(\theta)\tau(\lambda_0) \\ &= \ln V_{m0}(\lambda_0) - m(\theta)\tau(\lambda_0) \\ &= C_1'' m(\theta) + C_2'' \end{aligned} \quad (11)$$

442 where  $V_{m0}(\lambda_0) = C V_{S0}(\lambda_0)$ .  $C_2'' = \ln V_{m0}$  is determined from the ordinate intercept  
 443 of a least-square fit when one plots the left-hand side of the above equation versus  
 444 airmass  $m(\theta)$ .

445  $V_{S0}$  can be determined by applying the Langley method to data taken during the  
 446 daytime. If  $V_{S0}$  is determined, the coefficient  $C$  can be determined by taking the  
 447 ratio of  $V_{m0}$  and  $V_{S0}$ . If the coefficient  $C$  is 1, the reflectance of the ROLO model  
 448 will be correct. If the coefficient  $C$  is greater than 1 (less than 1), the reflectance in  
 449 the ROLO model is under-estimated (over-estimated).

450

451 5.2 Results

452

453 Examples of Langley plots in the visible and near-infrared wavelengths are shown  
454 in Fig. 3. In these examples, the regression lines can be well determined for any  
455 wavelength.  $C_2'' = \ln V_{m0}$  is determined from the ordinate intercept of the regression  
456 line (see eq. (11)). At the 340 nm wavelength, the regression line tends to deviate  
457 from the measured values in the region of airmasses larger than 6. It is presumed  
458 that the detector output at the 340 nm wavelength is small and hence may be  
459 nonlinear. The output at the time of observation was about  $1 \times 10^{-12}$  A. When using  
460 output values less than this, the user needs to treat their results with caution. At the  
461 940 nm wavelength, the modified Langley method was applied. In this example, the  
462 regression line provides a good fit.

463 In Fig. 4, examples of the Langley plot in the shortwave infrared region (1225, 1627,  
464 2200 nm) are shown. The detector output of these channels range from  $2 \times 10^{-10}$  to  
465  $5 \times 10^{-10}$  A, and the root mean square error of the random noise is  $4 \times 10^{-11}$  A. The ratio  
466 of noise to detector output is large and it is difficult to use these channels for  
467 estimating the aerosol optical depth.

468 In Fig. 5, the relationship between the coefficient  $C(=V_{m0}/V_{S0})$  and the phase  
469 angle in the visible and near-infrared wavelength region (from 340 to 1020 nm) is  
470 shown. As shown in the previous section, [the corrected lunar reflectance is assumed  
471 to be proportional to the ROLO reflectance, and the proportional coefficient  \$C\$](#)  is the  
472 ratio of the calibration constant for the moon and [the sun. That is, the coefficient  \$C\$](#)   
473 indicates the error of the ROLO reflectance, and thus more accurate reflectance can  
474 be obtained by multiplying the ROLO reflectance by the coefficient  $C$ . As can be  
475 seen from this figure, the coefficient  $C$  is often greater than 1 and depends on the  
476 phase angle. At most wavelengths, the coefficient  $C$  is small when the absolute  
477 value of the phase angle is small (near the full moon) and increases as the absolute  
478 value of the phase angle increases. The range of  $C$  is 0.95 to 1.18. The absorption  
479 band of water vapor is at the 940 nm wavelength. [Water vapor in the atmosphere  
480 tends to fluctuate. Therefore, it is difficult to make accurate Langley plots,](#) and the  
481 accuracy of both  $V_{S0}$  and  $V_{m0}$  is poor. Therefore, no clear relationship between  $C$   
482 and the phase angle is found, but the coefficient  $C$  is about 1.16. The fact that  $C$  is  
483 larger than 1 means that the reflectance of the ROLO irradiance model is  
484 underestimated.

485 In Fig. 6, the relationship between the coefficient  $C(=V_{m0}/V_{S0})$  and the phase  
486 angle in the shortwave infrared wavelength region (1225, 1627, 2200 nm) is shown.

487 In these channels, the error for  $C$  is large, but the coefficient  $C$  depends on the  
488 phase angle as in the visible and near-infrared wavelength region;  $C$  is small when  
489 the phase angle is near zero and increases as the absolute value of the phase angle  
490 increases.

491 In this study, the phase angle dependence of the coefficient  $C$  is approximated by  
492 a quadratic equation of the absolute value of the phase angle:

$$493 \quad C = A_c \cdot g^2 + B_c \quad (12)$$

494 where  $g$  is the phase angle.

495 That is,

$$496 \quad V_{m0} = V_{s0} \cdot (A_c \cdot g^2 + B_c) \quad (13)$$

497 The coefficients  $A_c$  and  $B_c$  are shown in Table 3. The regression line was plotted  
498 in Figs. 5 and 6. By using this approximation, the reflectance of the ROLO model can  
499 be estimated to within 1% in most channels. By using this approximation, the data  
500 processing to estimate the aerosol optical depth from the measured value becomes  
501 straightforward. The coefficients,  $F_C$ , for smoothing the ROLO reflectance are also

502 shown in Table 3. The coefficients  $A_c'$  and  $B_c'$  of the regression equation when  
503 using the smoothed ROLO reflectance are also given.

504 The size of the error in the reflectance in the ROLO irradiance model is dependent  
505 on the phase angle. The ROLO reflectance was obtained by dividing the lunar  
506 irradiance measured by Kieffer and Stone (2005) by the solar spectral irradiance of  
507 the 1985 Wehrli Standard Extraterrestrial Solar Irradiance Spectrum (Wehrli 1985,  
508 Neckel and Labs 1981). The solar spectral irradiances are dependent on the solar  
509 spectral models. Therefore, the ROLO reflectance includes an error due to the error  
510 in the solar spectral irradiance of 1985 Wehrli. Instrument performance, data  
511 processing, and so on are also sources of error. In this study,  $C$  is approximated as a  
512 symmetric quadratic equation of the phase angle, but the phase angle dependence of  
513  $C$  is asymmetric (see Figs. 5 and 6). The applicable range of the ROLO reflectance  
514 model is a phase angle of about 95 degrees or less. In order to improve the accuracy of  
515 the ROLO reflectance model and expand its application range, it is necessary to  
516 further accumulate the reflectance data of the moon.

517

## 518 6. Results of comparison

519

520 In order to validate the estimations of AOD and PWV, we compared them with the  
521 AOD and PWV obtained by independent methods. We investigated whether there is

522 a difference between daytime and nighttime measurements, and compared the  
523 measurements for the daytime and nighttime with measurement data which was  
524 recorded independently of POM-02 and has the same accuracy and precision in the  
525 daytime and nighttime.

526 Furthermore, the continuity of the AOD and PWV before and after sunrise and  
527 sunset was investigated, and the AOD and PWV of AERONET and POM-02 at MLO  
528 were also compared.

529

### 530 6.1 Aerosol optical depth (AOD)

531

532 The AOD estimated from POM-02 was compared with the value of the NIES/HSRL  
533 (wavelength: 532 nm).

534 Figures 7 (a) and (b) show the scatter plot of the aerosol optical depth during the  
535 daytime and nighttime, respectively. In Fig. 7 (c), the scatter plot during the  
536 nighttime is shown together with that during the daytime. Table 4 shows the results  
537 of the comparison between NIES/HSRL and POM-02 AOD: the statistics of the  
538 difference between the two AODs, the coefficients of the linear regression equation of  
539 NIES/HSRL and POM-02 AOD ( $\tau_{HSRL} = C_1 \cdot \tau_{POM02} + C_2$ ), the RMSE of the residual,  
540 the 95% confidence interval of the coefficients, and the number of observations.

541 The difference in the slope value of the regression coefficients is 0.1600 (= 1.0477 –  
542 0.8877). The 95% confidence interval of the coefficient is about  $\pm 0.04$  during both the  
543 daytime and the nighttime. It cannot be said that the slopes of the two regression  
544 lines are equal based on their 95% confidence intervals. However, the correlation  
545 between NIES/HSRL and POM-02 AOD is high, and the differences between them  
546 and their RMSEs are similar. Furthermore, as shown in Fig. 7 (c), the scatter  
547 diagrams for the daytime and nighttime are almost overlapping, and it seems that  
548 the two sets of measurements obtained similar results.

549 Examples of time series of the AOD from NIES/HSRL and POM-02 are shown in  
550 Fig. 8. As can be seen from these figures, the AOD of the daytime and nighttime  
551 estimated from POM-02 constitute a continuous series. The AOD from NIES/HSRL  
552 and that from POM-02 have qualitatively similar time variations. However, in these  
553 limited examples, while there are periods when the values are consistent, there are  
554 periods when there are systematic differences.

555 In the NIES/HSRL data processing, the AOD below an altitude of 500 m is  
556 calculated by using the value of the extinction coefficient for an altitude of 500 m.  
557 Since the height of the atmospheric boundary layer is typically 1500 to 2000 m, a  
558 large amount of aerosols exist at altitudes below 500 m. If the actual distribution



559 deviates from the assumed distribution, the estimated AOD is shifted systematically.

560 In Fig. 8 only limited examples were shown, but in the Supplement, the time series  
561 of the AOD at 500 nm at Tsukuba for 5 months is shown in Fig. S1. In addition, the  
562 time series of the comparison between the HSRL and POM-02 AOD for 5 months is  
563 shown in Fig. S3.

564

## 565 6.2 Precipitable water vapor (PWV)

566

567 The PWV estimated from POM-02 was compared with that obtained from the  
568 vertical profile of the radiosonde and that obtained from the GPS receiver. The PWV  
569 estimated from the radiosonde data has a frequency of two values per day, whereas  
570 the PWV obtained from GPS is continuous.

571

### 572 6.2.1 Radiosonde

573

574 The PWV from a radiosonde is often used as a reference for the PWV measurement  
575 value. The PWV from the radiosonde and PWV from POM-02 are first compared.  
576 Figure 9 shows a scatter plot of the PWV from the radiosonde and from POM-02. The  
577 red symbol denotes 00 UTC (09 LST), and the blue symbol is 12 UTC (21 LST). Table  
578 5 shows the results of the comparison between the radiosonde and POM-02  
579 precipitable water vapor (Table 5 is the same as Table 4 except for radiosonde and  
580 POM-02 precipitable water vapor).

581 The ratio of PWV estimated from POM-02 and the radiosonde in both daytime and  
582 nighttime is almost constant: the slope of the regression line is 0.80 in the daytime  
583 and 0.78 in the nighttime.

584 The empirical formula of the transmittance is expressed as eq. (5). The ratio of the  
585 two PWVs is almost constant. In addition, as shown in Fig. 5, the modified Langley  
586 plot provides a good fit for the data. From these facts, it seems that the value of the  
587 coefficient  $b$  in eq. (5) is appropriate but the value of the coefficient  $a$  in eq. (5)  
588 was inappropriate. It is possible that the filter characteristics of the 940 nm channel  
589 have changed from the nominal characteristics due to degradation.

590 Let  $p_{wv} = c \cdot p_{wv}'$  and rewrite eq. (5) as follows:

$$\begin{aligned} 591 \quad Tr(\text{H}_2\text{O}) &= \exp(-a(m(\theta) \cdot (c \cdot p_{wv}'))^b) \\ &= \exp(-ac^b(m(\theta) \cdot p_{wv}')^b) \end{aligned} \quad (14)$$

592 Then the PWV can be corrected by replacing  $a$  with  $ac^b$ .

593 Figure 10 shows a scatter plot of the PWV from the radiosonde and the corrected

594 PWV from POM-02. For the correction coefficient  $c$ , the average value of the  
595 coefficients  $C_1$  of the daytime and nighttime regression equations was used. Table 6  
596 shows the results of the comparison between the radiosonde and corrected POM-02  
597 precipitable water vapor (Table 6 is the same as Table 4 except for radiosonde and  
598 corrected POM-02 precipitable water vapor).

599 The slope  $C_1$  of the regression line during the daytime and nighttime is 1.0160  
600 and 0.9869, respectively, and the difference between them is 0.0291 (= 1.0160 –  
601 0.9869). The 95% confidence intervals of the slopes during the daytime and  
602 nighttime are  $\pm 0.0206$  and  $\pm 0.0271$ , respectively. The difference between them is  
603 0.0291, which is larger than the respective 95% confidence intervals. Therefore, the  
604 two slopes are not equivalent based on the 95% confidence intervals.

605 However, since the slope of the regression line determined using all of the data is  
606 1.0042 and the 95% confidence interval is  $\pm 0.0173$ , the three slopes of the regression  
607 lines can be regarded as equivalent at the 95% confidence level. Furthermore, there  
608 are no large differences in the bias, RMSE, and correlation coefficient between PWV  
609 from the radiosonde and POM-02. Therefore, the PWVs of daytime and nighttime for  
610 POM-02 are statistically equivalent. That is, both PWVs are presumed to have the  
611 same degree of precision and accuracy within the measurement uncertainty.

612

### 613 6.2.2 GPS

614

615 Next, the result of the comparison between the PWV obtained from POM-02 and  
616 GPS is shown. Before that, the result of the comparison between the PWV obtained  
617 from GPS and the radiosonde is shown in Fig. 11. Table 7 shows the results of the  
618 comparison between GPS and radiosonde precipitable water vapor (Table 7 is the  
619 same as Table 4 except for GPS and radiosonde precipitable water vapor).

620 The slope of the regression line in Fig. 11 is about 0.94. In the region of the PWV  
621 less than 2 g/cm<sup>2</sup>, the PWV from GPS tends to be smaller than the PWV from the  
622 radiosonde. In the region of PWV more than 3 g/cm<sup>2</sup>, the difference between PWV  
623 from GPS and the radiosonde is more scattered. Therefore, the slope of the  
624 regression line became smaller than 1. In a previous comparison conducted by the  
625 authors, the slope of the regression line was almost 1 (Uchiyama et al. 2014). There  
626 is a possibility that the PWV from GPS used in this study has a larger error than the  
627 PWV used previously.

628 Figure 12 shows a scatter diagram of the PWV from GPS and the corrected PWV  
629 from POM-02. Table 8 shows the results of the comparison between PWV from GPS  
630 and corrected PWV from POM-02 (Table 8 is the same as Table 4 except for GPS and

631 [corrected POM-02 precipitable water vapor](#)).

632 The slope of the regression line is about 0.91 for both the daytime and nighttime.  
633 Similar to the results of the comparison between the PWV from the radiosonde and  
634 GPS, in the region of PWV from GPS less than 2 g/cm<sup>2</sup>, the PWV from GPS tends to  
635 be somewhat smaller than the PWV from POM-02 during both the daytime and  
636 nighttime. In the region of PWV greater than 3 g/cm<sup>2</sup>, the difference between the  
637 PWV from GPS and the radiosonde is more scattered.

638 The difference between the slopes of the regression lines is 0.0076 (= 0.9132 –  
639 0.9056) and the 95% confidence intervals during the daytime and nighttime are  
640 ±0.0097 and ±0.0221, respectively. Therefore, the confidence intervals of the two  
641 slopes are overlapping, and the values of slopes can be regarded as equivalent at the  
642 95% confidence level.

643 In [Fig. 12 \(c\)](#), the scatter plot obtained using nighttime data is shown together  
644 with that obtained using daytime data. The data obtained during the daytime and  
645 nighttime overlap, and it seems that the PWV from POM-02 during the daytime and  
646 nighttime are estimated with the same degree of precision and accuracy.

647 Examples of time series of PWV from GPS and POM-02 are shown in [Fig. 13](#). The  
648 PWV from GPS and that from POM-02 have [qualitatively](#) similar time variations. In  
649 [these limited examples](#), although there are some systematic differences in [Fig. 13 \(b\)](#),  
650 the PWV from GPS and the PWV from POM-02 almost overlap in [Figs. 13 \(a\) and \(c\)](#).  
651 In addition, the PWV during the daytime and nighttime estimated from POM-02 are  
652 continuously connected.

653 In [Fig. 13](#), only limited examples were shown, but in the Supplement, the time  
654 series of the PWV at Tsukuba for 5 months is shown in [Fig. S2](#). In addition, the time  
655 series of the comparison between GPS and POM-02 PWV for 5 months is shown in  
656 [Fig. S4](#).

657

### 658 [6.3 Comparison of AOD \(PVW\) before and after sunrise and sunset](#)

659

660 The comparison of the AOD (PVW) before and after sunrise and sunset is used to  
661 evaluate the moon photometry ([Berkoff et al. 2011](#), [Barreto et al. 2013, 2016, 2017](#),  
662 [2019](#)).

663 Before and after sunrise (sunset), the AOD before sunrise (after sunset) is the  
664 average of the data with a solar altitude angle between –10 and –15 degrees, with a  
665 lunar phase angle less than 100 degrees, and with a lunar altitude angle of more  
666 than 10 degrees. The AOD after sunrise (before sunset) is the average of the data  
667 with a solar altitude angle between 10 and 15 degrees. Since this comparison is

668 effective when the atmosphere is stable, only data with small variations were  
669 selected; standard deviation / average value is less than 0.1 or standard deviation is  
670 less than 0.02.

671 Figure 14 shows a scatter plot of the AOD at the wavelengths of 340, 380, 400, 500,  
672 675, 870, and 1020 nm, and the PWV from the 940 nm channel. Table 9 shows the  
673 results of the comparison between the AOD (PWV) from the sun and from the moon  
674 (The contents of Table 9 are the same as Table 4 except for the AOD (PWV) from the  
675 sun and the moon).

676 The biases at wavelengths of 340 and 380 nm are relatively large, 0.05 and 0.03,  
677 respectively, but the biases at other wavelengths are 0.007 or less. The bias and  
678 RMSE of the PWV are 0.02 and 0.14, respectively, which are comparable to those  
679 from the comparison with POM-02 and the radiosonde or GPS. The correlation  
680 coefficient is high for all wavelengths; 0.65 at a wavelength of 340 nm, and 0.97 or  
681 higher at other wavelengths. Furthermore, the 95% confidence interval of the slope  
682 value of the regression line includes 1, and the 95% confidence interval of the  
683 intercept value includes 0. That is, the regression line is not different from a straight  
684 line with a slope of 1 and zero intercept at the 95% confidence level. From these facts,  
685 the AOD and PWV retrieved using the moon as the light source are considered to be  
686 the same as those retrieved using the sun as the light source at the 95% confidence  
687 level.

688

#### 689 6.4 Comparison between AERONET and POM-02

690

691 There is an AERONET observation site at MLO. In the nighttime, the AODs at  
692 wavelengths of 500, 675, 870, and 1020 nm, and the PWV can be compared. In  
693 addition to these channels, the AOD at wavelengths of 340, 380, 1020, and 1627 nm  
694 can be compared in the daytime. The AERONET data used here are “level 2.0” in the  
695 daytime and “level 1.5” in the nighttime. There were no “level 2.0” nighttime data.  
696 AERONET “level 1.5” is cloud-screened data but may not have had the final  
697 calibration applied. Thus, these data are not quality assured. AERONET “level 2.0”  
698 has pre- and post-field calibration applied, cloud-screened, and quality-assured data  
699 (see the AERONET homepage, <https://aeronet.gsfc.nasa.gov/>). The nighttime  
700 comparison in this paper uses the AERONET data without quality assurance.

701 Figure 15 shows a scatter plot of the AERONET and POM-02 AOD (PWV). The  
702 blue (red) symbols show the daytime (nighttime) data. Both the daytime and the  
703 nighttime data are overlaid; the AOD at wavelengths of 500, 675, 870, 1020, 1627 nm,  
704 and the PWV from the 940 nm channel. The plotted data are the 15-minute averages.

705 The number of measurements for POM-02 in a 15-minute interval is 10 to 16, and  
706 that for AERONET is 1 to 6. Only POM-02 data showing small variations were  
707 selected; (standard deviation)/average is less than 0.1 or standard deviation is less  
708 than 0.02.

709 Table 10 shows the results of the comparison between the AERONET and POM-02  
710 aerosol optical depth (precipitable water vapor) (Table 10 is the same as Table 4  
711 except for AERONET and POM-02 aerosol optical depth (precipitable water vapor)).  
712 The values at 940 nm are the precipitable water vapor.

713 In the daytime, from Fig. 15, it can be seen that the differences between  
714 AERONET and POM-02 AOD (PWV) are small. The 95% confidence interval for the  
715 slope of the regression line does not necessarily include 1, but the slope value is  
716 nearly 1: between 0.97 and 1.11. The 95% confidence interval for the intercept of the  
717 regression line does not necessarily include 0, but the magnitude of the intercept is  
718 0.01 or less except for the 380 nm channel (0.015). The same can be said for the PWV  
719 of the 940 nm channel. In addition, the bias and RMSE are less than 0.01 except for  
720 the 380 nm channel (0.015), and those for the PWV at 940 nm are 0.018 and 0.022,  
721 respectively. Considering that the accuracy of the calibration constant is 0.5 to 1%,  
722 these values seem reasonable. Therefore, it can be inferred that in the daytime,  
723 POM-02 can measure the AOD (PWV) with the same level of accuracy as AERONET.

724 In the nighttime, the atmosphere observed at MLO was pristine, and most of the  
725 AOD at 500, 675, 870, and 1020 nm were below 0.02. Considering that the accuracy  
726 of the calibration constant is 0.5 to 1%, it is difficult to compare the AOD of  
727 AERONET and POM-02. In the nighttime, the slope of the regression line deviates  
728 from 1 at several wavelengths, but the bias and the RMSE are less than about 0.01.  
729 Therefore, the difference between AERONET and POM-02 is small. The slopes of the  
730 regression line for the PWV of 940 nm channel in the daytime and the nighttime are  
731 1.07 and 1.16, respectively. Thus, the daytime and nighttime values differ. In the  
732 results of section 6.3, there is almost no difference between the daytime and  
733 nighttime values. Therefore, this difference may be due to the lack of quality control  
734 in the nighttime data.

735

## 736 7. Summary and conclusion

737

738 Aerosol data are often estimated using the solar direct irradiance and the solar  
739 scattered radiance. Therefore, the majority of data on aerosol properties are obtained  
740 using daytime measurements, and there are few data available on aerosol  
741 characteristics at night. In order to estimate the aerosol optical depth (AOD) and the

742 precipitable water vapor (PWV) during the nighttime using the moon as a light  
743 source, POM-02 (Prede Ltd., Japan), which is used to estimate aerosol characteristics  
744 during the daytime, was modified.

745 The current POM-02 has the ability to measure the direct irradiance from the  
746 moon for some channels in the visible and near-infrared wavelength region without  
747 requiring modification. Several modifications were made to also be able to measure  
748 the AOD during the nighttime and expand the measurement ranges.

749 The amplifier was adjusted so that POM-02 could measure up to about  $5 \times 10^{-13}$  A:  
750 allowing the lunar direct irradiance to be measured in the wavelength range of 340  
751 to 1020 nm.

752 In order to track the moon based on the calculated value, the simplified formula  
753 by Nagasawa (1981) was incorporated into the firmware.

754 A position sensor with a four-quadrant detector is used to adjust the tracking of  
755 the sun and the moon. In order to adjust the tracking of the moon, a position sensor  
756 incorporating a new electronic circuit to amplify the signal and new software to  
757 process the signal data were developed. The new position sensor can be used to track  
758 both the sun and the moon.

759 The calibration constant was determined by using the Langley method. The  
760 measurements of the solar and lunar direct irradiance were conducted at the  
761 NOAA/MLO during the period from Sep. 28 to Nov. 7, 2017. Assuming that [the  
762 correct lunar reflectance is proportional to the ROLO reflectance](#), the calibration  
763 constant for the lunar direct irradiance was determined by using the Langley method.  
764 The calibration by the Langley method was successfully performed.

765 The ratio of the calibration constant for the moon to that for the sun was often  
766 greater than 1, [where the ratio is a coefficient for correcting the ROLO reflectance  
767 and includes a smoothing factor](#). This ratio shows the error of the ROLO irradiance  
768 model. The value of the ratio was 0.95 to 1.18 in the visible and near-infrared  
769 wavelength region. This means that the ROLO model often underestimates the  
770 reflectance. In addition, this ratio depended on the phase angle: when the phase  
771 angle was small (near the full moon), the ratio was small, and as the phase angle  
772 became larger, the ratio increased. In this study, this ratio was approximated by the  
773 quadratic [equation](#) of the phase angle. By using this approximation, the reflectance  
774 of the moon can be calculated to within an accuracy of 1% or less.

775 The continuous measurement of POM-02 was conducted at [JMA/MRI](#) from  
776 January 2018 to May 2018, and the AOD and PWV were estimated. In order to  
777 validate the estimates of the AOD and PWV, we compared them with the AOD and  
778 PWV obtained by independent methods. The AOD was compared with the AOD (532

779 nm) estimated from NIES/HSRL, and the PWV was compared with the PWV from a  
780 radiosonde and GPS. In addition, the continuity of the AOD (PWV) before and after  
781 sunrise and sunset at Tsukuba was examined, and the AOD (PWV) of AERONET  
782 and that of POM-02 at MLO were compared.

783 Concerning the AOD, there were sometimes systematic differences between  
784 NIES/HSRL and POM-02. The cause of the systematic differences seems to be that  
785 NIES/HSRL assumes a constant extinction coefficient at altitudes of less than 500 m.  
786 The slopes of the linear regression lines during the daytime and nighttime could not  
787 be said to be equivalent at the 95% confidence level, but the scatter diagrams of the  
788 daytime and nighttime were almost overlapping.

789 Concerning the PWV, the slopes of the linear regression lines during the daytime  
790 and nighttime were equivalent at the 95% confidence level in the comparisons  
791 between the PWV from POM-02 and the radiosonde and in the comparison between  
792 the PWV from POM-02 and GPS. Furthermore, the scatter diagrams of the daytime  
793 and the nighttime data were almost overlapping.

794 In addition, the comparison of the AOD (PWV) before and after sunrise and sunset  
795 showed that the AOD and PWV retrieved using the moon as the light source are the  
796 same as those retrieved using the sun as the light source at the 95% confidence level.

797 The comparison of the AOD (PWV) between AERONET and POM-02 was  
798 performed using the data taken during the calibration measurements. The  
799 comparison in the daytime showed that POM-02 can measure AOD (PWV) with the  
800 same accuracy as AERONET. The comparison in the nighttime showed that the  
801 difference in the AOD between AERONET and POM-02 was small. However, since  
802 there were a lot of optically thin data and AERONET data are not quality-assured,  
803 we cannot make a definite conclusion.

804 From these facts, the daytime and nighttime AOD (PWV) measurements are  
805 statistically almost equivalent. The AODs (PWVs) during the daytime and nighttime  
806 for POM-02 are presumed to have the same degree of precision and accuracy within  
807 the measurement uncertainty.

808 The accuracy of the nighttime calibration constant is lower than that for the  
809 daytime. The measurement S/N in the nighttime is also worse than that in daytime.  
810 Considering these facts, even if there is no statistically significant difference, the  
811 magnitude of the error in the AOD (PWV) during the nighttime is not always the  
812 same as during the daytime.

813 In this study, the calibration was performed using about 40 days of data including  
814 two full moon days. As a result, it was found that there was an error in the  
815 reflectance of the ROLO irradiance model. In the future, it is necessary to

816 accumulate more data for calibration and to reduce the error of the ROLO irradiance  
817 model. It is said that the ROLO model can be applied over a phase angle range of  
818 about 90 degrees. POM-02 has the ability to measure the direct lunar irradiance up  
819 to a phase angle range of about 120 degrees. It is necessary to expand the ROLO  
820 irradiance model so that it can be applied to larger phase angles.

821 It is now possible to estimate the aerosol optical depth during the nighttime. It is  
822 necessary to promote the adoption of this system in the existing observation network.  
823 After that, the data obtained by using this instrument can be used to better  
824 understand nighttime aerosol behavior, for the validation of aerosol transport models,  
825 and as input data in assimilation systems.

826

827

## 828 **Appendix A.**

829 The smoothed ROLO reflectance  $\tilde{A}_{ROLO}$  can be obtained by the procedure described  
830 in Kieffer and Stone (2005).

831 The calculated reflectance  $A_{ROLO}(g, \Phi, \theta, \phi)$  at the 32 ROLO wavelengths for a  
832 specific geometric configuration ( $g = 7 \text{ deg}, \Phi = 7 \text{ deg}, \theta = 0, \phi = 0$ ) is fitted to a  
833 composite spectrum of the samples obtained by the Apollo 16 mission with a linear  
834 equation of wavelength  $\lambda$ .

$$835 \quad A_{Apollo} = (a + b\lambda)A_{ROLO}(7, 7, 0, 0) \quad (a1)$$

836 where  $A_{Apollo}$  is the composite laboratory reflectance spectrum for the Apollo samples  
837 of soil (95%) (Apollo 16 sample 62231, (Pieters 1999)) and breccia (5%) (Apollo 16  
838 sample 67455 (Pieters and Mustard 1988)).

839 The Apollo sample 62231 spectrum is available at  
840 <http://www.planetary.brown.edu/pds/AP62231.html>. The Apollo sample 67455  
841 spectrum is shown in Fig. 8 in the paper of Pieters and Mustard (1988).

842 The values of the coefficients  $a$  and  $b$  are not shown in Kieffer and Stone (2005),  
843 but were determined here with the least squares method as follows:

$$844 \quad a = 1.640875$$

$$845 \quad b = -1.192034 \times 10^{-4}$$

846 where the unit of the wavelengths is nanometers.

847 By dividing  $A_{Apollo}$  by  $a + b\lambda$ , the smoothed ROLO reflectance for a specific

848 geometric configuration  $\tilde{A}_{ROLO}(7, 7, 0, 0)$  can be obtained.



849  $\tilde{A}_{ROLO}(7,7,0,0) = A_{Apollo} / (a + b\lambda)$  (a2)

850 The smoothed ROLO reflectance  $\tilde{A}_{ROLO}(g, \Phi, \theta, \phi)$  for any viewing geometry is  
 851 given by the following equation:

852 
$$\begin{aligned} \tilde{A}_{ROLO} &= \frac{\tilde{A}_{ROLO}(7,7,0,0)}{A_{ROLO}(7,7,0,0)} A_{ROLO}(g, \Phi, \theta, \phi) \\ &= F_C A_{ROLO}(g, \Phi, \theta, \phi) \end{aligned}$$
 (a3)

853 where  $F_C = \tilde{A}_{ROLO}(7,7,0,0) / A_{ROLO}(7,7,0,0)$ .

854 The values of  $F_C$  are dependent on the interpolation method of the reflectance  
 855 table and the accuracy of the values read from the figure. The smoothed and adjusted  
 856 spectrum  $\tilde{A}_{ROLO}(7,7,0,0)$  is shown in Fig. A1. The values of  $F_C$  determined by the  
 857 authors are shown in Table A1 and Fig. A2.

858

859

860 **Data availability.**

861 The data used in this study are available from the corresponding author.

862

863 **Author contributions.**

864 This study was designed by AU, MS, HK, and TM. The measurements for the sky  
 865 radiometer were conducted by AU, AK, KI, and YW. The adjustment of the amplifier  
 866 and the development of the position sensor were performed by MS, HK, KI, KK, and  
 867 YW. The development of the related software and the data analyses were performed  
 868 by AU. The manuscript was written by AU, and all authors contributed to editing  
 869 and revision.

870

871 **Competing interests.**

872 The authors declare that they have no conflict of interest.

873

874 **Acknowledgements**

875 This work was supported by the NIES GOSAT-2 project, Japan. This work was also  
 876 supported by JSPS KAKENHI Grant Number 17K00531. We would like to thank Dr.  
 877 Y. Jin and Dr. T. Nishizawa of NIES for providing the NIES/HSRL data for the  
 878 comparison of the aerosol optical depth. We also would like to thank Dr. Y. Shoji of

879 JMA/MRI for providing the GPS data for the comparison of precipitable water vapor.  
880 We thank Dr. B. Holben and his staff for their effort in establishing and maintaining  
881 the AERONET Mauna Loa site. We would like to thank Dr. T. Stone and two  
882 anonymous reviewers for their useful comments.

883

#### 884 **References**

885 Acton Jr, C. H.: Ancillary data services of NASA's Navigation and Ancillary  
886 Information Facility, *Planet. Space Sci.*, **44**, Issue 1, 65-70, 1996.

887 Asano, S., Murai, K., and Yamauchi, T.: An improvement of the computation method  
888 of the atmospheric turbidity factors, *J. Meteorol. Res.*, **35**, 135-144, 1983 (in  
889 Japanese).

890 Barreto, A., Cuevas, E., Damiri, B., Guirado, C., Berkoff, T., Berjón, A. J., Hernández,  
891 Y., Almansa, F., and Gil, M.: A new method for nocturnal aerosol measurements  
892 with a lunar photometer prototype, *Atmos. Meas. Tech.*, **6**, 585–598,  
893 <https://doi.org/10.5194/amt-6-585-2013>, 2013.

894 Barreto, Á., Cuevas, E., Granados-Muñoz, M.-J., Alados-Arboledas, L., Romero, P. M.,  
895 Gröbner, J., Kouremeti, N., Almansa, A. F., Stone, T., Toledano, C., Román, R.,  
896 Sorokin, M., Holben, B., Canini, M., and Yela, M.: The new sun-sky-lunar Cimel  
897 CE318-T multiband photometer – a comprehensive performance evaluation,  
898 *Atmos. Meas. Tech.*, **9**, 631–654, <https://doi.org/10.5194/amt-9-631-2016>, 2016.

899 Barreto, Á., Román, R., Cuevas, E., Berjón, A. J., Almansa, A. F., Toledano, C.,  
900 González, R., Hernández, Y., Blarel, L., Goloub, P., Guirado, C., and Yela, M.:  
901 Assessment of nocturnal aerosol optical depth from lunar photometry at the Izaña  
902 high mountain observatory, *Atmos. Meas. Tech.*, **10**, 3007–3019,  
903 <https://doi.org/10.5194/amt-10-3007-2017>, 2017.

904 Barreto, A., Román, R., Cuevas, E., Pérez-Ramírez, D., Berjón, A.J., Kouremeti, N.,  
905 Kazadzis, S., Gröbner, J., Mazzola, M., Toledano, C., Benavent-Oltra, J.A., Doppler,  
906 L., Juryšek, J., Almansa, A.F., Victori, S., Maupin, F., Guirado-Fuentes, C.,  
907 González, R., Vitale, V., Goloub, P., Blarel, L., Alados-Arboledas, L., Woolliams, E.,  
908 Taylor, S., Antuña, J.C., Yela, M.: Evaluation of night-time aerosols measurements  
909 and lunar irradiance models in the frame of the first multi-instrument nocturnal  
910 intercomparison campaign, *Atmospheric Environment* **202**, 190–211,  
911 <https://doi.org/10.1016/j.atmosenv.2019.01.006>, 2019.

912 Berkoff, T. A., Sorokin, M., Stone, T., Eck, T. F., Hoff, R., Welton, E., and Holben, B.:  
913 Nocturnal aerosol optical depth measurements with a small-aperture automated  
914 photometer using the moon as a light source, *J. Atmos. Ocean. Tech.*, **28**, 1297–  
915 1306, <https://doi.org/10.1175/JTECH-D-10-05036.1>, 2011.

916 Bruegge, C. J., Conel, J. E., Green, R. O., Margolis, J. S., Holm, R. G., and Toon, G.:  
917 Water vapor column abundance retrievals during FIFE, *J. Geophys. Res.*, **97**,  
918 18,759–18,768, 1992.

919 Cachorro, V. E., Utrillas, P., Vergaz, R., Duran, P., de Frutos, A. M., and  
920 Martinez-Lozano, J. A.: Determination of the atmospheric-water-vapor content in  
921 the 940-nm absorption band by use of moderate spectral-resolution measurements  
922 of direct solar irradiance. *Appl. Opt.*, **37**, 4678–4689, 1998.

923 Campanelli, M., Nakajima, T., Khatri, P., Takamura, T., Uchiyama, A., Estellés, V.,  
924 Liberti, G. L., Malvestuto, V.: Retrieval of characteristic parameters for water  
925 vapour transmittance in the development of ground based Sun-Sky radiometric  
926 measurements of columnar water vapour, *Atmos. Meas. Tech.*, **7**, 1075–1087,  
927 doi:10.5194/amt-7-1075-2014, 2014.

928 Dockery, D. W., Pope, C. A., Xu, X., Spengler, J. D., Ware, J. H., Fay, M. E., Ferris, Jr.,  
929 B. G., and Speizer, F. E.: An Association between Air Pollution and Mortality in Six  
930 U.S. Cities. *New Engl. J. Med.*, **329**, 1753-1759, 1993.

931 Dutton, E.G., Reddy, P., Ryan, S., and DeLuisi, J.: Features and Effects of Aerosol  
932 Optical Depth Observed at Mauna Loa, Hawaii: 1982-1992. *J. Geophys. Res.* **99**,  
933 8295-8306, 1994.

934 Esposito, F., Serio, C., Pavese, G., Auriemma, G., and Satriano, C.: Measurements of  
935 nighttime atmospheric optical depth preliminary data from a mountain site in  
936 southern Italy. *J. Aerosol Sci.*, **29** (10), 1213–1218, 1998.

937 Esposito, F., Mari, S., Pavese, G., and Serio, C.: Diurnal and Nocturnal  
938 Measurements of Aerosol Optical Depth at a Desert Site in Namibia, *Aerosol*  
939 *Science and Technology*, **37**, 392-400, DOI: 10.1080/027868203000972, 2003.

940 Fernald, F.G.: Analysis of atmospheric lidar observations: some comments. *Appl. Opt.*  
941 **5**, 652–653, <https://doi.org/10.1364/AO.23.000652>, 1984.

942 Guerrero-Rascado, J. L., Landulfo, E., Antuña, J. C., Barbosa, H. de M. J., Barja, B.,  
943 Bastidas, Á. E., Bedoya, A. E., da Costa, R. F., Estevan, R., Forno, R., Gouveia, D.  
944 A., Jiménez, C., Larroza E. G., da Silva Lopes, F. J., Montilla-Rosero, E., Moreira,  
945 G. de A., Nakaema, W. M., Nisperuza, D., Alegria, D., Múnera, M., Otero, L.,  
946 Papandrea, S., Pallota, J. V., Pawelko, E. Quel, E. J., Ristori, P., Rodrigues, P. F.,  
947 Salvador, J., Sánchez, M. F., and Silva, A.: Latin American Lidar Network  
948 (LALINET) for aerosol research: diagnosis on network instrumentation, *J. Atmos.*  
949 *Sol. Terr. Phys.*, **138–139**, 112–120, 2016.

950 Halthore, R. N., Eck, T. F., Holben, B. N., and Markham, B. L.: Sun photometric  
951 measurements of atmospheric water vapor column abundance in the 940-nm band.  
952 *J. Geophys. Res.*, **102**(D4), 4343–4352, doi:10.1029/96JD03247, 1997.

953 Herber, A., Thomason, L. W., Gernandt, H., Leiterer, U., Nagel, D., Schulz, K-H.,  
954 Kaptur, J., Albrecht, T., and Notholt, J.: Continuous day and night aerosol optical  
955 depth observations in the Arctic between 1991 and 1999. *J. Geophys. Res.*, 107,  
956 4097, doi:10.1029/2001JD000536, 2002.

957 Holben, B. N., Eck, T. F., Slutsker, I., Tanré, D., Buis, J. P., Setzer, A., Vermote, E.,  
958 Reagan, J. A., Kaufman, Y. J., Nakajima, T., Lavenu, F., Jankowiak, I., and  
959 Smirnov, A.: AERONET-A federated instrument network and data archive for  
960 aerosol characterization. *Remote Sens. Environ.*, **66**, 1-16, 1998.

961 Ingold, T., Schmid, B., Matzler, C., Demoulin, P., and Kampfer, N.: Modeled and  
962 empirical approaches for retrieving columnar water vapor from solar  
963 transmittance measurements in the 0.72, 0.82, and 0.94  $\mu\text{m}$  absorption bands. *J.*  
964 *Geophys. Res.*, **105**, 24,327–24,343, 2000.

965 Juryšek, J., Prouza, M.: Sun/Moon photometer for the Cherenkov Telescope Array -  
966 first results, Proceedings of Science, 35th International Cosmic Ray Conference  
967 -ICRC2017, 2017.

968 Kahn, R. A., Gaitley, B. J., Martonchik, J. V., Diner, D. J., Crean, K. A., and Holben,  
969 B.: Multiangle Imaging Spectroradiometer (MISR) global aerosol optical depth  
970 validation based on 2 years of coincident Aerosol Robotic Network (AERONET)  
971 observations. *J. Geophys. Res.*, 110, D10S04, doi:10.1029/2004JD004706, 2005.

972 Kasten, F., and Young, A. T.: Revised optical air mass tables and approximation  
973 formula. *Appl. Opt.*, **28**, 4735–4738, 1989.

974 Klett, J.D.: Lidar inversion with variable backscatter/extinction ratios. *Appl. Opt.* **11**,  
975 1638–1643, <https://doi.org/10.1364/AO.24.001638>, 1985.

976 Kiedron, P., Michalsky, J., Schmid, B., Slater, D., Berndt, J., Harrison, L., Racette, P.,  
977 Westwater, E., and Han, Y.: A robust retrieval of water vapor column in dry Arctic  
978 conditions using the rotating shadowband spectroradiometer. *J. Geophys. Res.*,  
979 **106**, 24,007– 24,016, 2001.

980 Kiedron, P., Berndt, J., Michalsky, J., and Harrison, L.: Column water vapor from  
981 diffuse irradiance. *Geophys. Res. Lett.*, **30**(11), 1565, doi:10.1029/2003GL016874,  
982 2003.

983 Kieffer, H. H.: Photometric stability of the lunar surface. *Icarus*, **130**, 323–327, 1997.

984 Kieffer, H. H., and Stone, T. C.: The spectral irradiance of the moon. *Astron. J.*, **129**,  
985 2887–2901, 2005.

986 Kikuchi, M., Murakami, H., Suzuki, K., Nagao, T. M., Higurashi, A.: Improved  
987 Hourly Estimates of Aerosol Optical Thickness Using Spatiotemporal Variability  
988 Derived From Himawari-8 Geostationary Satellite, *IEEE Trans, Geosci. Remote*  
989 *Sens.*, **56** (6), 3442-3455, doi: 10.1109/TGRS.2018.2800060, 2018.

990 Kouremeti, N., Gröbner, J., Kazadzis, S., Pfiffner, D., Soder, R.: Development of a  
991 Lunar PFR. pp. 21.  
992 [https://www.pmodwrc.ch/wp-content/uploads/2017/09/2015\\_Annual\\_Report.pdf](https://www.pmodwrc.ch/wp-content/uploads/2017/09/2015_Annual_Report.pdf),  
993 2016.

994 Levis, J. R., Campbell, J. R., Welton, E. J., Stewart, S. A., and Phillip C. Haftings, P.  
995 C.: Overview of MPLNET version 3 cloud detection, *J. Atmos. Oceanic Technol.*,  
996 **33**, 2113–2134, <http://dx.doi.org/10.1175/JTECH-D-15-0190.1>, 2016.

997 Lohmann, U., and Feichter, J.: Global indirect aerosol effects: a review. *Atmos. Chem.*  
998 *Phys.*, **5**, 715–737, 2005.

999 Michalsky, J. J., Liljegren, J. C., and Harrison, L. C.: A comparison of sun photometer  
1000 derivations of total column water vapor and ozone to standard measures of same at  
1001 the Southern Great Plains atmospheric radiation measurement site. *J. Geophys.*  
1002 *Res.*, **100**, 25,995–26,003, 1995.

1003 Michalsky, J. J., Min, Q., Kiedron, P. W., Slater, D. W., and Barnard, J. C.: A  
1004 differential technique to retrieve column water vapor using sun radiometry. *J.*  
1005 *Geophys. Res.*, **106**, 17,433–17,442, 2001.

1006 Neckel, H. and Labs, D.: Improved Data of Solar Spectral Irradiance from 0.33 to  
1007 1.25  $\mu\text{m}$ , *Sol. Phy.*, **74**, 231–249, doi:10.1007/BF00151293, 1981.

1008 Nagasawa, K.: Tentai no ichi keisan (Position calculation of celestial bodies), Chjin  
1009 Shokan, p. 239, 1981 (in Japanese).

1010 Pappalardo, G., Amodeo, A., Apituley, A., Comeron, A., Freudenthaler, V., Linné, H.,  
1011 Ansmann, A., Bösenberg, J., D'Amico, G., Mattis, I., Mona, L., Wandinger, U.,  
1012 Amiridis, V., Alados-Arboledas, L., Nicolae, D., and Wiegner, M.: EARLINET:  
1013 towards an advanced sustainable European aerosol lidar network, *Atmos. Meas.*  
1014 *Tech.*, **7**, 2389–2409, <https://doi.org/10.5194/amt-7-2389-2014>, 2014.

1015 Pérez-Ramírez, D., Aceituno, J., Ruiza, B., Olmo, F. J., and Alados-Arboledas, L.:  
1016 Development and calibration of a star photometer to measure the aerosol optical  
1017 depth: Smoke observations at a high mountain site. *Atmos. Environ.*, **42**, 2733–  
1018 2738, 2008.

1019 Perry K. D., Cahill, T. A., Schnell, R. C., and Harris, J. M.: Long-range transport of  
1020 anthropogenic aerosols to the National Oceanic and Atmospheric Administration  
1021 baseline station at Mauna Loa Observatory, Hawaii, *J. Geophys. Res.*, **104**, 18,521–  
1022 18,533, 1999.

1023 Pieters, C. M.: The Moon as a Calibration Standard Enabled by Lunar Samples, in  
1024 New Views of the Moon II: Understanding the Moon through the Integration of  
1025 Diverse Datasets, ed. L. Gaddis & C. K. Shearer (Houston: LPI), 47, 1999.

1026 Pieters, C. M., and Mustard, J. F.: Exploration of crustal/mantle material for the

1027 earth and moon using reflectance spectroscopy, *Remote Sensing of Environment*,  
1028 24, 151-178, 1988.

1029 Plana-Fattori, A., Legrand, M., Tanre, D., Devaux, C., Vermeulen, A., and Dubuisson,  
1030 P.: Estimating the atmospheric water vapor content from sun photometer  
1031 measurements. *J. Appl. Meteorol.*, **37**, 790– 804, 1998.

1032 Plana-Fattori, A., Dubuisson, P., Fomin, B. A., and de Paula Correa, M.: Estimating  
1033 the atmospheric water vapor content from multi-filter rotating shadow-band  
1034 radiometry at Sao Paulo, Brazil. *Atmos. Res.*, **71**, 171– 192, 2004.

1035 Prados, A. I., Kondragunta, S., Ciren, P., and Knapp, K. R.: GOES Aerosol/Smoke  
1036 Product (GASP) over North America: Comparisons to AERONET and MODIS  
1037 observations. *J. Geophys. Res.*, **112**, D15201, doi:10.1029/2006JD007968, 2007.

1038 Ramanathan, V., Crutzen, P. J., Kiehl, J. T., and Rosenfeld, D.: Aerosols, Climate,  
1039 and the Hydrological Cycle. *Science*, **294**, 2119-2124, 2001.

1040 Reagan, J. A., Thome, K., Herman, B., and Gall, R.: Water vapor measurements in  
1041 the 0.94 micron absorption band-Calibration, measurements and data applications.  
1042 *in Proc. Int. Geoscience and Remote Sensing '87 Symposium, Ann Arbor, Michigan,*  
1043 *IEEE*, pp. 63–67, 1987a.

1044 Reagan, J. A., Pilewskie, P. A., Herman, B. M., and Ben-David, A.: Extrapolation of  
1045 Earth-based solar irradiance measurements to exoatmospheric levels for  
1046 broad-band and selected absorption-band observations. *IEEE Trans. Geosci.*  
1047 *Remote Sens.*, **25**, 647–653, 1987b.

1048 Reagan, J., Thome, K., Herman, B., Stone, R., DeLuisi, J., and Snider, J.: A  
1049 comparison of columnar water vapor retrievals obtained with near-IR solar  
1050 radiometer and microwave radiometer measurements. *J. Appl. Meteorol.*, **34**,  
1051 1384–1391, 1995.

1052 Remer, L. A., Kaufman, Y. J., Tanré, D., Mattoo, S., Chu, D. A., Martins, J. V., Li,  
1053 R.-R., Ichoku, C., Levy, R. C., Kleidman, R. G., Eck, T. F., Vermote, E., and Holben,  
1054 B. N.: The MODIS aerosol algorithm, products and validation. *J. Atmos. Sci.*, **62**,  
1055 947–973, <https://doi.org/10.1175/JAS3385.1>, 2005.

1056 Schmid, B., and Wehrli, C.: Comparison of Sun photometer calibration by use of the  
1057 Langley technique and the standard lamp, *Appl. Opt.*, **34**, 4500–4512, 1995.

1058 Schmid, B., Thome, K. J., Demoulin, P., Peter, R., Matzler, C., and Sekler, J.:  
1059 Comparison of modeled and empirical approaches for retrieving columnar water  
1060 vapor from solar transmittance measurements in the 0.94- $\mu\text{m}$  region. *J. Geophys.*  
1061 *Res.*, **101**, 9345–9358, 1996.

1062 Schmid, B., Michalsky, J. J., Slater, D. W., Barnard, J. C., Halthore, R. N., Liljegren,  
1063 J. C., Holben, B. N., Eck, T. F., Livingston, J. M., Russell, P. B., Ingold, T., and

1064 Slutsker, I.: Comparison of columnar water-vapor measurements from solar  
1065 transmittance methods, *Appl. Opt.*, **40**, 1886–1896, 2001.

1066 Shaw, G. E.: Solar spectral irradiance and atmospheric transmission at Mauna Loa  
1067 Observatory, *Appl. Opt.*, **21**, 2006–2011, 1982.

1068 Shaw, G. E.: Sun photometry. *Bull. Am. Meteorol. Soc.*, **64**, 4–11, 1983.

1069 Shimizu, A., Nishizawa, T., Jin, Y., Kim, S.-W., Wang, Z., Batdorj, D., Sugimoto, N.:  
1070 Evolution of a lidar network for tropospheric aerosol detection in East Asia, *Opt.*  
1071 *Eng.*, **56**(3), 031219 (2016), doi: 10.1117/1.OE.56.3.031219, 2016.

1072 Shiobara, M., Spinhirne, J. D., Uchiyama, A., and Asano, S.: Optical depth  
1073 measurements of aerosol, cloud, and water vapor using sun photometers during  
1074 FIRE Cirrus IFO II. *J. Appl. Meteorol.*, **35**, 36–46, 1996.

1075 Shoji, Y.: Retrieval of Water Vapor Anisotropy using the Japanese Nationwide GPS  
1076 Array and its Potential for Prediction of Convective Precipitation. *J. Meteor. Soc.*  
1077 *Japan*, **91**, 43-62, 2013.

1078 Takamura, T, Nakajima, T., and SKYNET community group: Overview of SKYNET  
1079 and its Activities. Proceedings of AERONET workshop. *El Arenosillo. Optica Pura*  
1080 *y Aplicada*, **37**, 3303–3308, 2004.

1081 Thome, K., Herman, B. M., and Reagan, J. A.: Determination of precipitable water  
1082 from solar transmission. *J. Appl. Meteorol.*, **31**, 157-165, 1992.

1083 Thome, K. J., Smith, M. W., Palmer, J. M., and Reagan, J. A.: Three-channel solar  
1084 radiometer for the determination of atmospheric columnar water vapor. *Appl. Opt.*,  
1085 **33**, 5811 –5819, 1994.

1086 Uchiyama, A., Yamazaki, A., Kudo, R.: Column Water Vapor Retrievals from  
1087 Sky-radiometer (POM-02) 940nm Data. *J. Meteorol. Soc. Japan*, **92A**, 195-203,  
1088 DOI:10.2151/jmsj.2014-A13, 2014.

1089 Uchiyama, A., Matsunaga, T., and Yamazaki, A.: The instrument constant of sky  
1090 radiometers (POM-02) – Part 1: Calibration constant, *Atmos. Meas. Tech.*, **11**,  
1091 5363-5388, <https://doi.org/10.5194/amt-11-5363-2018>, 2018.

1092 Wang, M., Bailey, S., and McClain, C. R.: SeaWiFS provides unique global aerosol  
1093 optical property data. *Eos, Trans. Amer. Geophys. Union*, **81**, 197–202, 2000.

1094 World Health Organisation: WHO Air quality guidelines for particulate matter,  
1095 ozone, nitrogen dioxide and sulfur dioxide; Global update 2005; Summary of risk  
1096 assessment. World Health Organization, Geneva, Switzerland, p. 22, 2006.

1097 World Health Organization Regional Office for Europe: Review of Evidence on  
1098 Health Aspects of Air Pollution–REVIHAAP Project, Technical Report WHO,  
1099 Copenhagen, p. 298, 2013.

1100 Wehrli, C.: Extraterrestrial Solar Spectrum, Publication no. 615,

1101 Physikalisch-Meteorologisches Observatorium + World Radiation Center  
1102 (PMO/WRC) Davos Dorf, Switzerland, July 1985.

1103 Wehrli, C.: GAW–PFR: A network of Aerosol Optical Depth observations with  
1104 Precision Filter Radiometers. In: WMO/GAW Experts workshop on a global surface  
1105 based network for long term observations of column aerosol optical properties,  
1106 Tech. rep., GAW Report No. 162, WMO TD No. 1287, [ftp://ftp.wmo.int/  
1107 Documents/PublicWeb/arep/gaw/gaw162.pdf](ftp://ftp.wmo.int/Documents/PublicWeb/arep/gaw/gaw162.pdf), 2005.

1108 Welton, E. J., Campbell, J. R., Spinhirne, J. D., and Scott, V. S.: Global monitoring of  
1109 clouds and aerosols using a network of micro-pulse lidar systems. *Lidar Remote  
1110 Sensing for Industry and Environmental Monitoring*, U. N. Singh, T. Itabe, and N.  
1111 Sugimoto, Eds., International Society for Optical Engineering (SPIE Proceedings,  
1112 Vol. 4153), 151–158, 2001.

1113 Winker, D. M., Hunt, W. H., and McGill, M. J.: Initial performance assessment of  
1114 CALIOP. *Geophys. Res. Lett.*, **34**, L19803, doi:10.1029/2007GL030135, 2007.

1115 Yokota, Y., Matsunaga, T., Ohtake, M., Haruyama, J., Nakamura, R., Yamamoto, S.,  
1116 Ogawa, Y., Morota, T., Honda, C., Saiki, K., Nagasawa, K., Kitazato, K., Sasaki, S.,  
1117 Iwasaki, A., Demura, H., Hirata, N., Hiroi, T., Honda, R., Iijima, Y., Mizutani, H.:  
1118 Lunar photometric properties at wavelengths 0.5–1.6  $\mu\text{m}$  acquired by SELENE  
1119 Spectral Profiler and their dependency on local albedo and latitudinal zones,  
1120 *Icarus*, **215**, 639-660, 2011.

1121 Yoshida, M., Kikuchi, M., Nagao, T. M., Murakami, H., Nomaki, T., Higurashi, A.:  
1122 Common Retrieval of Aerosol Properties for Imaging Satellite Sensors, *J. Meteorol.  
1123 Soc. Jpn.*, **96B**, 193-209, doi: 10.2151/jmsj.2018-039, 2018.

1124



1125

1126 Table 1 Examples of calibration coefficient  $V_{S_0}$  for the solar measurement.

1127 Table 2 Measurement ranges before (current) and after modification (new) of

1128 POM-02.  $I_n$  and  $I_{n-1}$  are the upper and lower limits of the current (unit: A),

1129 respectively.

1130

1131 Table 3 Coefficients of the regression equation for reflectance correction factor C.

1132

1133 Table 4 Results of the comparison between NIES/HSRL and POM-02 aerosol optical

1134 depth.

1135

1136 Table 5 Same as Table 4 except for radiosonde and POM-02 precipitable water vapor.

1137

1138 Table 6 Same as Table 4 except for radiosonde and corrected POM-02 precipitable

1139 water vapor.

1140

1141 Table 7 Same as Table 4 except for GPS and radiosonde precipitable water vapor.

1142

1143 Table 8 Same as Table 4 except for GPS and corrected POM-02 precipitable water

1144 vapor.

1145

1146 [Table 9 Same as Table 4 except for the AOD \(PWV\) from the sun and the moon.](#)

1147

1148 [Table 10 Same as Table 4 except for the AERONET and POM-02 aerosol optical](#)

1149 [depth \(precipitable water vapor\).](#)

1150

1151

1152 Figure captions

1153 Fig. 1 An example of sensor output for the solar direct irradiances and the scattered

1154 sky radiances by POM-02.

1155

1156 [Fig. 2 An example of the measurements taken on Oct. 14, 2017 at NOAA/MLO. The](#)

1157 [phase angle of the moon \(right y-axis\) is from 117.6 to 118.0 degrees.](#)

1158

1159 Fig. 3 Examples of the Langley plot in the visible and near-infrared region [on Nov. 5,](#)

1160 [2017. The y-axis is the equation in parentheses on the left-hand side of eq. \(11\).](#)

1161 [\(a\) 340, 380, 400, 500 nm; \(b\) 675, 870, 1020 nm; \(c\) 940 nm, modified Langley](#)

1162 [method](#).

1163

1164 Fig. 4 Examples of the Langley plot in the shortwave infrared region.

1165

1166 Fig. 5 Relationship between phase angle and reflectance correction factor  
1167  $C = V_{m0} / V_{s0}$  in the visible and near-infrared region. A regression curve  
1168 ( $C = A_c \cdot g^2 + B_c$ ,  $g$ : phase angle) was also plotted.

1169

1170 Fig. 6 Relationship between phase angle and reflectance correction factor  
1171  $C = V_{m0} / V_{s0}$  in the shortwave infrared region. A regression curve ( $C = A_c \cdot g^2 + B_c$ ,  $g$ :  
1172 Phase angle) was also plotted.

1173

1174 Fig. 7 Scatter plot of HSRL and POM-02 aerosol optical depth at 532 nm. (a) daytime  
1175 (red), (b) nighttime (blue), (c) overlapping daytime (red) with nighttime (blue).

1176

1177 Fig. 8 Examples of time series of HSRL (red), POM-02 daytime (green) and nighttime  
1178 (blue) aerosol optical depths at 532 nm. The phase angles ( $g$ ) during the  
1179 measurement periods were (a)  $g = -21.863$  to  $35.881$  degrees, (b)  $g = 47.454$  to  $83.190$   
1180 degrees, and (c)  $g = -19.150$  to  $21.573$  degrees.

1181

1182 Fig. 9 Scatter plot of radiosonde and POM-02 precipitable water vapor. Daytime  
1183 (nighttime) measurements are indicated by a red (blue) symbol.

1184

1185 Fig. 10 Same as Fig. 9 except for corrected POM-02 precipitable water vapor.

1186

1187 Fig. 11 Scatter plot of GPS and radiosonde precipitable water vapor.

1188

1189 Fig. 12 Scatter plot of PWV from GPS and corrected PWV from POM-02. (a) daytime  
1190 (red), (b) nighttime (blue), (c) overlapping daytime (red) with nighttime (blue).

1191

1192 Fig. 13 Examples of time series of GPS (red), POM-02 daytime (green) and nighttime  
1193 (blue) corrected precipitable water vapor. The phase angles ( $g$ ) during the  
1194 measurement periods were (a)  $g = -21.863$  to  $35.881$  degrees, (b)  $g = -19.150$  to  
1195  $21.573$  degrees, and (c)  $g = -55.145$  to  $30.611$  degrees.

1196

1197 Fig. 14 Scatter plot of the aerosol optical depth (precipitable water vapor) from the  
1198 sun and the moon. (a) 340 nm AOD, (b) 380 nm AOD, (c) 400 nm AOD, (d) 500 nm

1199 AOD, (e) 675 nm AOD, (f) 870 nm AOD, (g) 940 nm PWV, (h) 1020 nm AOD.

1200

1201 Fig. 15 Scatter plot of AERONET and POM-02 aerosol optical depth (precipitable  
1202 water vapor). Daytime (nighttime) measurements are indicated by a red (blue)  
1203 symbol. (a) 340 nm AOD, (b) 380 nm AOD, (c) 500 nm AOD, (d) 675 nm AOD, (e) 870  
1204 nm AOD, (f) 940 nm PWV, (g) 1020 nm AOD, (h) 1627 nm AOD.

1205

1206

1207 Appendix A

1208

1209 Table A1 Coefficients for smoothing at the ROLO 32 wavelength.

1210

1211 Fig. A1 Coefficients for smoothing at the ROLO 32 wavelength.

1212

1213 Fig. A2 ROLO smoothed and adjusted reflectance.

1214

1215

Table 1 Examples of calibration coefficient  $V_{S0}$  for the solar measurement.

|                               |        |        |       |       |       |       |       |       |
|-------------------------------|--------|--------|-------|-------|-------|-------|-------|-------|
| Wavelength (nm)               | 340    | 380    | 400   | 500   | 675   | 870   | 940   | 1020  |
| $V_{S0} (\times 10^{-4})$ (A) | 0.1799 | 0.1882 | 1.603 | 3.174 | 3.444 | 2.299 | 1.055 | 1.077 |

|                               |        |       |        |
|-------------------------------|--------|-------|--------|
| Wavelength (nm)               | 1225   | 1627  | 2200   |
| $V_{S0} (\times 10^{-4})$ (A) | 0.9305 | 1.321 | 0.7873 |

Table 2 Measurement range before (current) and after modification (new) of POM-02.

$I_n$  and  $I_{n-1}$  are the upper and lower limits of the current (unit: A), respectively.

| Range no. |             | Current              |                        | New                       |                             |
|-----------|-------------|----------------------|------------------------|---------------------------|-----------------------------|
| 1         | $I_1 - I_2$ | $2.5 \times 10^{-3}$ | – $2.5 \times 10^{-4}$ | $2.5 \times 10^{-3}$      | – $1.25 \times 10^{-4}$     |
| 2         | $I_2 - I_3$ | $2.5 \times 10^{-4}$ | – $2.5 \times 10^{-5}$ | $1.25 \times 10^{-4}$     | – $6.25 \times 10^{-6}$     |
| 3         | $I_3 - I_4$ | $2.5 \times 10^{-5}$ | – $2.5 \times 10^{-6}$ | $6.25 \times 10^{-6}$     | – $3.125 \times 10^{-7}$    |
| 4         | $I_4 - I_5$ | $2.5 \times 10^{-6}$ | – $2.5 \times 10^{-7}$ | $3.125 \times 10^{-7}$    | – $1.5625 \times 10^{-8}$   |
| 5         | $I_5 - I_6$ | $2.5 \times 10^{-7}$ | – $2.5 \times 10^{-8}$ | $1.5625 \times 10^{-8}$   | – $7.8125 \times 10^{-10}$  |
| 6         | $I_6 - I_7$ | $2.5 \times 10^{-8}$ | – $2.5 \times 10^{-9}$ | $7.8125 \times 10^{-10}$  | – $3.90625 \times 10^{-11}$ |
| 7         | $I_7$       | $2.5 \times 10^{-9}$ | – 0.0                  | $3.90625 \times 10^{-11}$ | – 0.0                       |
|           | $I_n$       | $I_n = I_{n-1} / 10$ |                        | $I_n = I_{n-1} / 20$      |                             |

Table 3 Coefficients of the regression equation for reflectance correction factor C.

| Wavelength (nm) | $A_c$                   | $B_c$   | RMS    | $F_c$   | $A_c'=A_c/F_c$          | $B_c'=B_c/F_c$ | RMS/ $F_c$ | No. of data |
|-----------------|-------------------------|---------|--------|---------|-------------------------|----------------|------------|-------------|
| 340             | $1.3404 \times 10^{-5}$ | 0.98027 | 0.0152 | 0.8993  | $1.4905 \times 10^{-5}$ | 1.09010        | 0.0169     | 15          |
| 380             | $1.3512 \times 10^{-5}$ | 1.0674  | 0.0080 | 1.0153  | $1.3309 \times 10^{-5}$ | 1.05140        | 0.0079     | 15          |
| 400             | $3.0760 \times 10^{-6}$ | 1.0058  | 0.0055 | 0.95270 | $3.2287 \times 10^{-6}$ | 1.05570        | 0.0058     | 15          |
| 500             | $2.2487 \times 10^{-6}$ | 1.1600  | 0.0058 | 1.0184  | $2.2081 \times 10^{-6}$ | 1.13910        | 0.0057     | 15          |
| 675             | $4.8644 \times 10^{-6}$ | 1.0840  | 0.0048 | 0.95705 | $5.0827 \times 10^{-6}$ | 1.13260        | 0.0050     | 15          |
| 870             | $3.4967 \times 10^{-6}$ | 1.0855  | 0.0026 | 0.95705 | $3.6537 \times 10^{-6}$ | 1.13420        | 0.0027     | 15          |
| 940             | $7.2405 \times 10^{-8}$ | 1.1532  | 0.0404 | 1.0292  | $7.0352 \times 10^{-8}$ | 1.12050        | 0.0392     | 13          |
| 1020            | $6.7912 \times 10^{-6}$ | 1.0559  | 0.0078 | 0.97065 | $6.9966 \times 10^{-6}$ | 1.08790        | 0.0081     | 15          |
| 1225            | $9.0288 \times 10^{-5}$ | 1.0572  | 0.0328 | 1.0203  | $8.8491 \times 10^{-5}$ | 1.03620        | 0.0322     | 13          |
| 1627            | $2.3828 \times 10^{-5}$ | 1.0810  | 0.0237 | 1.0463  | $2.2774 \times 10^{-5}$ | 1.03310        | 0.0227     | 13          |
| 2200            | $3.7545 \times 10^{-6}$ | 0.95311 | 0.0386 | 0.97493 | $3.8511 \times 10^{-5}$ | 0.97763        | 0.0396     | 13          |

$$C = A_c \cdot g^2 + B_c$$

$g$ : phase angle (degrees)

$F_c$ : smoothing factor

Table 4 Results of the comparison between NIES/HSRL and POM-02 aerosol optical depth.

| POM-02   | Bias   | RMSE   | CR     | $C_1$  | C.I. of $C_1$ (95%) | $C_2$  | C.I. of $C_2$ (95%) | RMSE of reg. | NO of obs. |
|----------|--------|--------|--------|--------|---------------------|--------|---------------------|--------------|------------|
| Sun+Moon | 0.0437 | 0.0839 | 0.8266 | 0.9611 | $\pm 0.0295$        | 0.0486 | $\pm 0.0049$        | 0.0715       | 1889       |
| Sun      | 0.0432 | 0.0866 | 0.7650 | 0.8877 | $\pm 0.0425$        | 0.0573 | $\pm 0.0068$        | 0.0743       | 1192       |
| Moon     | 0.0466 | 0.0838 | 0.8825 | 1.0477 | $\pm 0.0414$        | 0.0405 | $\pm 0.0074$        | 0.0694       | 702        |

RMSE: Root mean square error

CR: Correlation coefficient

$C_1$  and  $C_2$ : coefficients of regression line ( $\tau_{HSRL} = C_1 \cdot \tau_{POM-02} + C_2$ )

C.I. of  $C_1$  (95%): 95% confidential interval of  $C_1$

C.I. of  $C_2$  (95%): 95% confidential interval of  $C_2$

RMSE of reg.: RMSE of regression line

Table 5 Same as Table 4 except for radiosonde and POM-02 precipitable water vapor.

| POM-02   | Bias    | RMSE   | CR     | $C_1$  | C.I. of $C_1$<br>(95%) | $C_2$   | C.I. of $C_2$<br>(95%) | RMSE of<br>reg. | No. of<br>obs. |
|----------|---------|--------|--------|--------|------------------------|---------|------------------------|-----------------|----------------|
| Sun+Moon | -0.2477 | 0.3037 | 0.9946 | 0.7948 | $\pm 0.0138$           | -0.0057 | $\pm 0.0196$           | 0.0658          | 141            |
| Sun      | -0.2206 | 0.2764 | 0.9945 | 0.8041 | $\pm 0.0165$           | -0.0044 | $\pm 0.0223$           | 0.0661          | 104            |
| Moon     | -0.3259 | 0.3726 | 0.9966 | 0.7811 | $\pm 0.0214$           | -0.0212 | $\pm 0.0343$           | 0.0508          | 37             |

PWV, Bias, RMSE, RMSE of reg.: g/cm<sup>2</sup>

$C_1$  and  $C_2$ : coefficients of regression line ( $PWV_{POM-02} = C_1 \cdot PWV_{Sonde} + C_2$ ).

Table 6 Same as Table 4 except for radiosonde and corrected POM-02 precipitable water vapor.

| POM-02   | Bias    | RMSE   | CR     | $C_1$  | C.I. of $C_1$<br>(95%) | $C_2$   | C.I. of $C_2$<br>(95%) | RMSE of<br>reg. | No. of<br>obs. |
|----------|---------|--------|--------|--------|------------------------|---------|------------------------|-----------------|----------------|
| Sun+Moon | -0.0027 | 0.0830 | 0.9946 | 1.0042 | $\pm 0.0173$           | -0.0077 | $\pm 0.0246$           | 0.0829          | 142            |
| Sun      | 0.0115  | 0.0848 | 0.9945 | 1.0160 | $\pm 0.0206$           | -0.0061 | $\pm 0.0278$           | 0.0831          | 105            |
| Moon     | -0.0454 | 0.0794 | 0.9966 | 0.9869 | $\pm 0.0271$           | -0.0272 | $\pm 0.0434$           | 0.0643          | 37             |

$C_1$  and  $C_2$ : coefficients of regression line ( $PWV_{POM-02}(corrected) = C_1 \cdot PWV_{Sonde} + C_2$ ).

Table 7 Same as Table 4 except for GPS and radiosonde precipitable water vapor.

| Sonde | Bias   | RMSE   | CR     | $C_1$  | C.I. of $C_1$<br>(95%) | $C_2$  | C.I. of $C_2$<br>(95%) | RMSE of<br>reg. | No. of<br>obs. |
|-------|--------|--------|--------|--------|------------------------|--------|------------------------|-----------------|----------------|
| Sonde | 0.0770 | 0.2229 | 0.9791 | 0.9425 | $\pm 0.0233$           | 0.1572 | $\pm 0.0403$           | 0.2007          | 274            |

$C_1$  and  $C_2$ : coefficients of regression line ( $PWV_{Sonde} = C_1 \cdot PWV_{GPS} + C_2$ ).

Table 8 Same as Table 4 except for GPS and corrected POM-02 precipitable water vapor.

| POM-02   | Bias   | RMSE   | CR     | $C_1$  | C.I. of $C_1$<br>(95%) | $C_2$  | C.I. of $C_2$<br>(95%) | RMSE of<br>reg. | No. of<br>obs. |
|----------|--------|--------|--------|--------|------------------------|--------|------------------------|-----------------|----------------|
| Sun+Moon | 0.0159 | 0.2050 | 0.9664 | 0.9032 | $\pm 0.0089$           | 0.1255 | $\pm 0.0122$           | 0.1896          | 2826           |
| Sun      | 0.0072 | 0.1939 | 0.9706 | 0.9056 | $\pm 0.0097$           | 0.1164 | $\pm 0.0137$           | 0.1787          | 2046           |
| Moon     | 0.0391 | 0.2232 | 0.9527 | 0.9132 | $\pm 0.0221$           | 0.1292 | $\pm 0.0279$           | 0.2106          | 671            |

$C_1$  and  $C_2$ : coefficients of regression line ( $PWV_{POM-02}(corrected) = C_1 \cdot PWV_{GPS} + C_2$ ).

Table 9 Same as Table 4 except for the AOD (PWV) from the sun and the moon.

| Wavelength (nm) | Bias    | RMSE   | CR     | $C_1$  | C.I. of $C_1$ (95%) | $C_2$   | C.I. of $C_2$ (95%) | RMSE of reg. | No. of obs. |
|-----------------|---------|--------|--------|--------|---------------------|---------|---------------------|--------------|-------------|
| 340             | -0.0527 | 0.0663 | 0.6485 | 0.7309 | 0.8335              | -0.0216 | 0.1034              | 0.0384       | 7           |
| 380             | -0.0289 | 0.0425 | 0.9726 | 0.9278 | 0.1042              | -0.0136 | 0.0261              | 0.0296       | 20          |
| 400             | -0.0058 | 0.0369 | 0.9700 | 0.9832 | 0.0874              | -0.0016 | 0.0256              | 0.0363       | 33          |
| 500             | 0.0068  | 0.0295 | 0.9734 | 1.0282 | 0.0905              | 0.0017  | 0.0196              | 0.0285       | 30          |
| 675             | 0.0039  | 0.0216 | 0.9717 | 1.0387 | 0.1021              | -0.0010 | 0.0153              | 0.0210       | 26          |
| 870             | 0.0020  | 0.0149 | 0.9806 | 1.0485 | 0.0830              | -0.0023 | 0.0093              | 0.0144       | 27          |
| 940             | -0.0236 | 0.1376 | 0.9751 | 1.0417 | 0.0730              | -0.0670 | 0.0865              | 0.1335       | 43          |
| 1020            | 0.0047  | 0.0152 | 0.9735 | 1.0726 | 0.1020              | -0.0008 | 0.0095              | 0.0139       | 26          |

$C_1$  and  $C_2$ : coefficients of the regression line ( $\tau_{Moon} = C_1 \cdot \tau_{Sun} + C_2, PWV_{Moon} = C_1 \cdot PWV_{Sun} + C_2$ ).

Table 10 Same as Table 4 except for the AERONET and POM-02 aerosol optical depth (precipitable water vapor).

| POM-02 | Wavelength (nm) | Bias    | RMSE   | CR     | $C_1$  | C. I. of $C_1$ (95%) | $C_2$   | C. I. of $C_2$ (95%) | RMSE of reg. | No. of obs. |
|--------|-----------------|---------|--------|--------|--------|----------------------|---------|----------------------|--------------|-------------|
| Sun    | 340             | 0.0082  | 0.0091 | 0.9855 | 0.9722 | 0.0212               | 0.0086  | 0.0006               | 0.0040       | 242         |
| Moon   | 340             | -----   | -----  | -----  | -----  | -----                | -----   | -----                | -----        | 0           |
| Sun    | 380             | 0.0148  | 0.0153 | 0.9819 | 0.9840 | 0.0237               | 0.0151  | 0.0006               | 0.0037       | 249         |
| Moon   | 380             | -----   | -----  | -----  | -----  | -----                | -----   | -----                | -----        | 0           |
| Sun    | 500             | -0.0046 | 0.0050 | 0.9884 | 1.0060 | 0.0196               | -0.0046 | 0.0004               | 0.0021       | 243         |
| Moon   | 500             | -0.0010 | 0.0054 | 0.7366 | 0.6369 | 0.1524               | 0.0044  | 0.0025               | 0.0045       | 59          |
| Sun    | 675             | 0.0083  | 0.0085 | 0.9839 | 1.0279 | 0.0235               | 0.0081  | 0.0003               | 0.0018       | 245         |
| Moon   | 675             | 0.0109  | 0.0112 | 0.8466 | 0.8119 | 0.1368               | 0.0123  | 0.0012               | 0.0024       | 56          |
| Sun    | 870             | -0.0015 | 0.0020 | 0.9877 | 1.0459 | 0.0210               | -0.0018 | 0.0002               | 0.0013       | 241         |
| Moon   | 870             | -0.0044 | 0.0059 | 0.7343 | 0.5275 | 0.1283               | 0.0004  | 0.0015               | 0.0028       | 58          |
| Sun    | 940             | 0.0177  | 0.0223 | 0.9996 | 1.0712 | 0.0038               | -0.0025 | 0.0013               | 0.0054       | 259         |
| Moon   | 940             | 0.0445  | 0.0535 | 0.9991 | 1.1610 | 0.0126               | 0.0035  | 0.0039               | 0.0086       | 59          |
| Sun    | 1020            | 0.0017  | 0.0023 | 0.9796 | 1.0393 | 0.0269               | 0.0015  | 0.0002               | 0.0015       | 244         |
| Moon   | 1020            | -0.0042 | 0.0080 | 0.4128 | 0.2846 | 0.1652               | 0.0038  | 0.0022               | 0.0045       | 58          |
| Sun    | 1627            | 0.0020  | 0.0029 | 0.9828 | 1.1100 | 0.0359               | 0.0017  | 0.0003               | 0.0019       | 132         |
| Moon   | 1627            | -----   | -----  | -----  | -----  | -----                | -----   | -----                | -----        | 0           |



Table A1 Coefficients for smoothing at the ROLO 32 wavelength

| Wavelength (nm) | Correction factor | Wavelength (nm) | Correction factor |
|-----------------|-------------------|-----------------|-------------------|
| 350.0           | 1.02766           | 763.7           | 1.00312           |
| 355.1           | 1.09314           | 774.8           | 0.95628           |
| 405.0           | 0.93705           | 865.3           | 0.94167           |
| 412.3           | 0.95166           | 872.6           | 0.96555           |
| 414.4           | 1.02732           | 882.0           | 0.94490           |
| 441.6           | 1.01667           | 928.4           | 0.97167           |
| 465.8           | 1.04970           | 939.3           | 1.04085           |
| 475.0           | 1.01461           | 942.1           | 0.99417           |
| 486.9           | 1.01748           | 1059.5          | 0.95872           |
| 544.0           | 1.02132           | 1243.2          | 1.02708           |
| 549.1           | 0.99098           | 1538.7          | 1.02616           |
| 553.8           | 1.02041           | 1633.6          | 1.04781           |
| 665.1           | 0.93882           | 1981.5          | 1.05865           |
| 693.1           | 0.99039           | 2126.3          | 1.08338           |
| 703.6           | 1.00576           | 2250.9          | 0.90003           |
| 745.3           | 0.99651           | 2383.6          | 0.98073           |

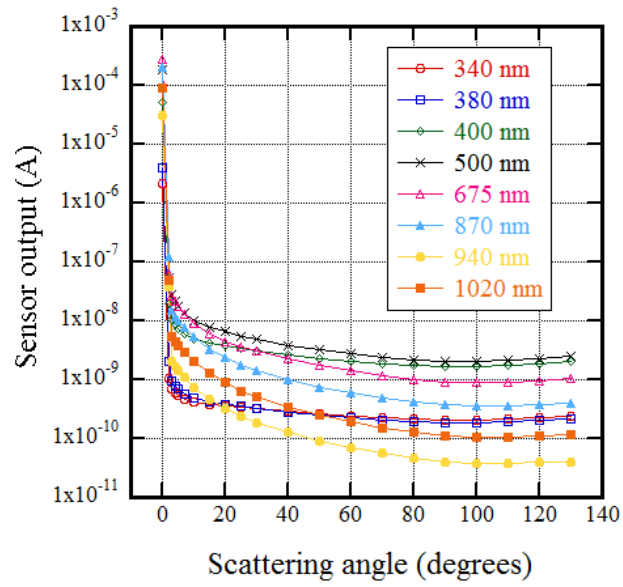

Fig. 1 Examples of sensor output for solar direct irradiances and scattered sky radiances from POM-02.

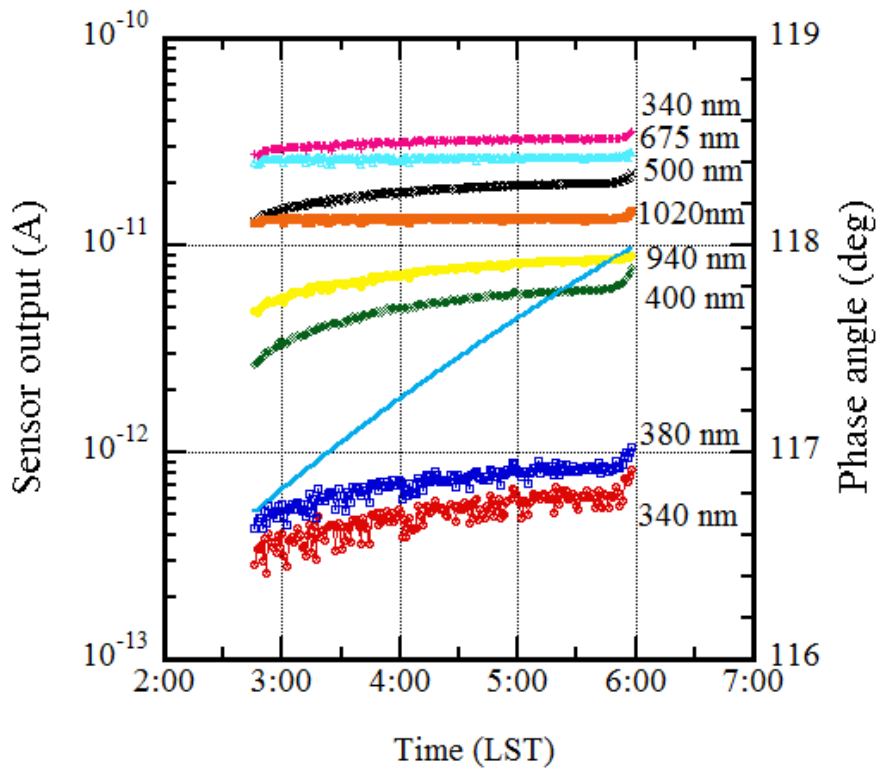

Fig. 2 An example of the measurements taken on Oct. 14, 2017 at NOAA/MLO. The phase angle of the moon (right y-axis) is from 117.6 to 118.0 degrees.

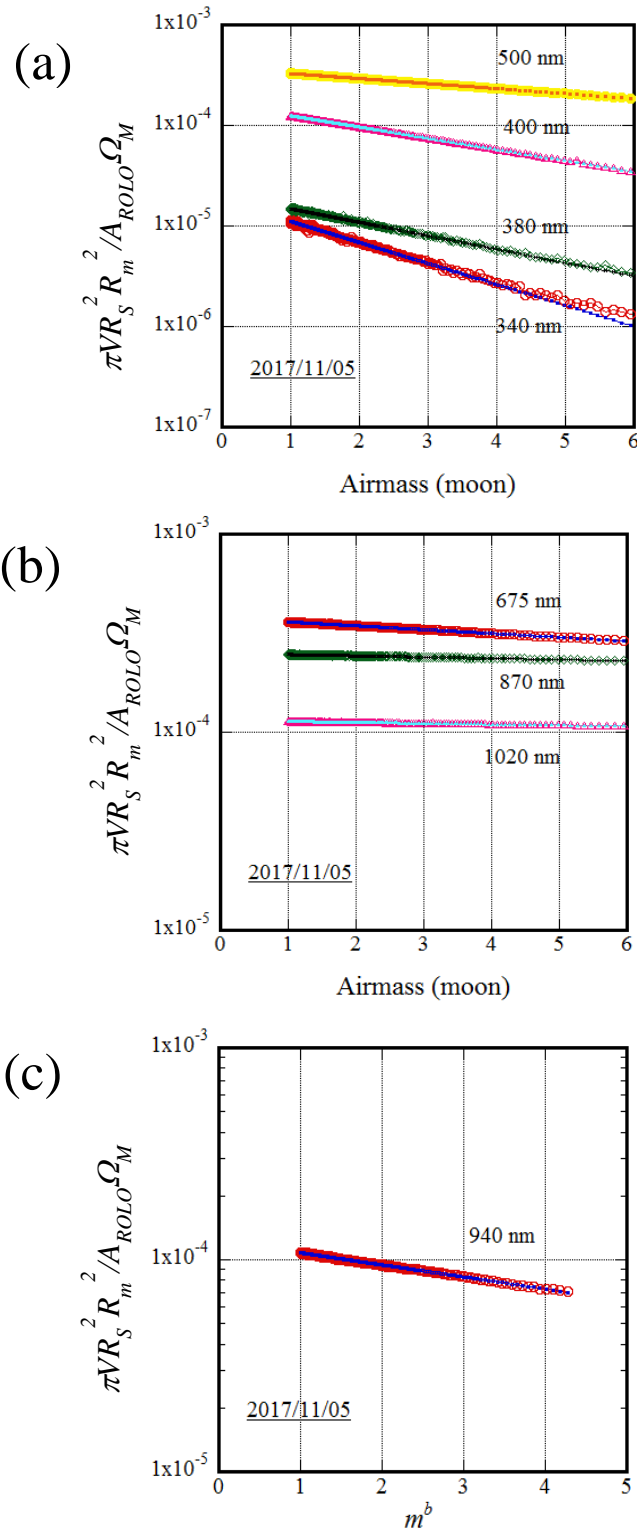

Fig. 3 Examples of the Langley plot in the visible and near-infrared region on Nov. 5, 2017. The y-axis is the equation in parentheses on the left-hand side of eq. (10).

(a) 340, 380, 400, 500 nm; (b) 675, 870, 1020 nm; (c) 940 nm, modified Langley method.

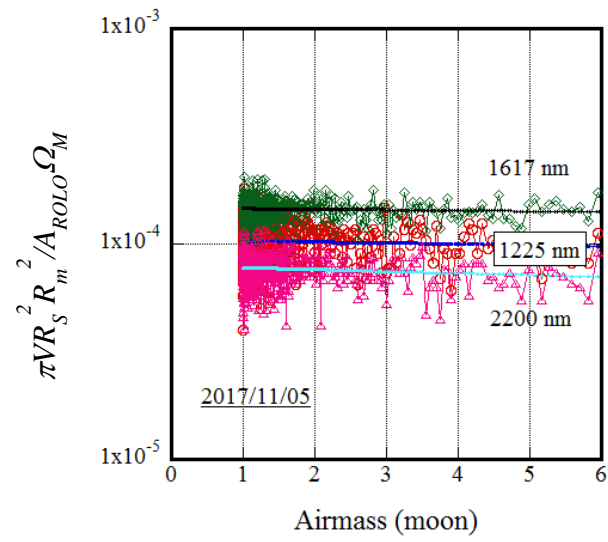

Fig. 4 Examples of the Langley plots in the shortwave infrared region.

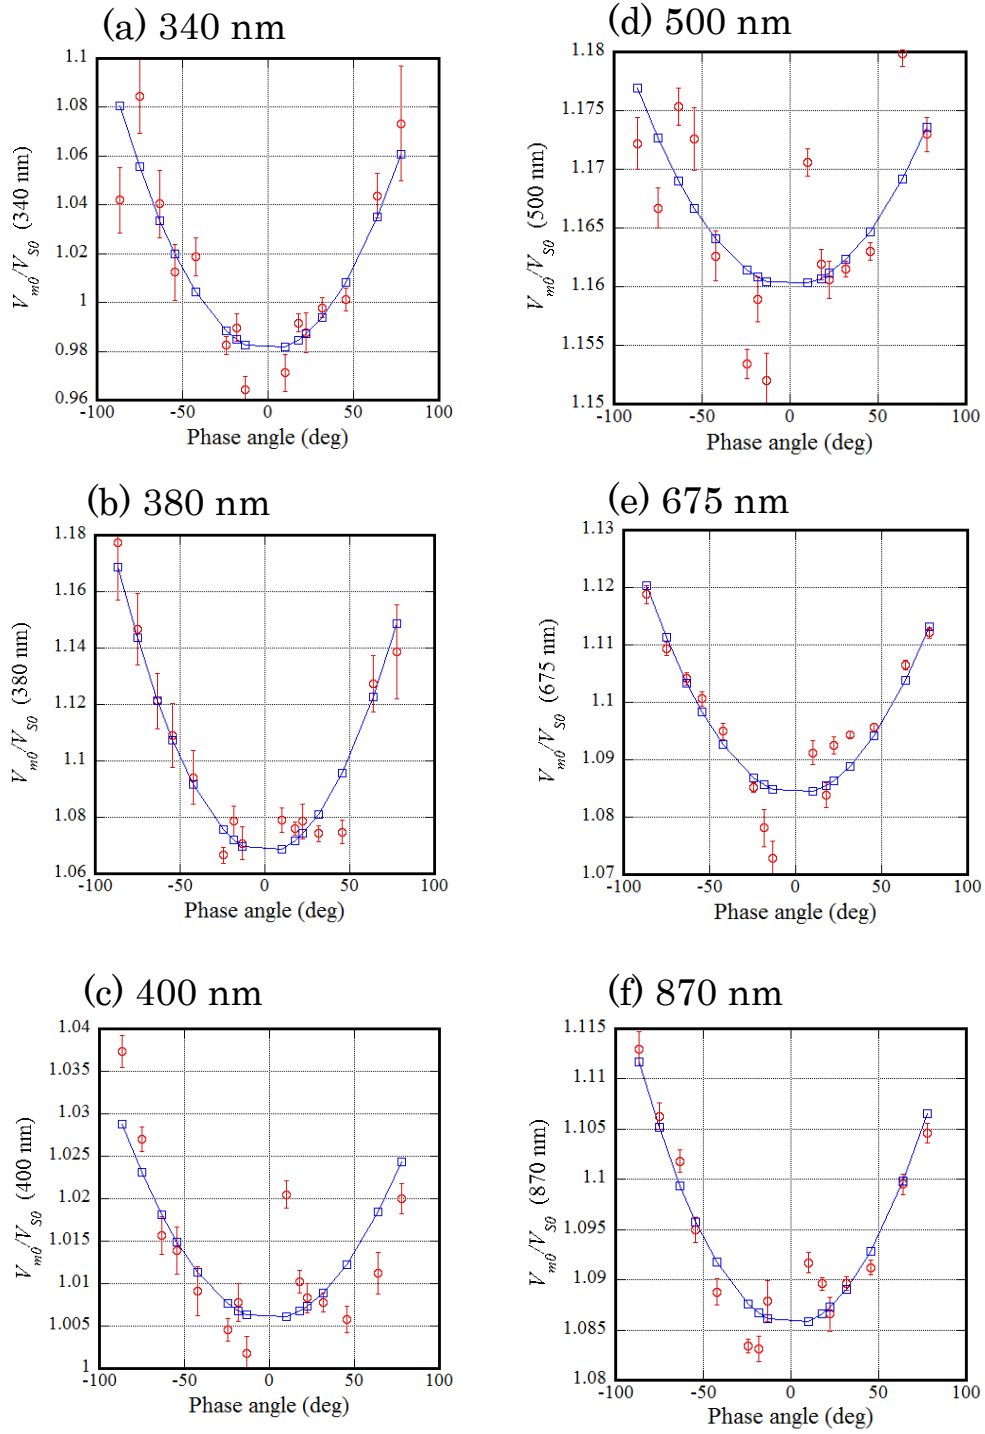

Fig. 5 to be continued.

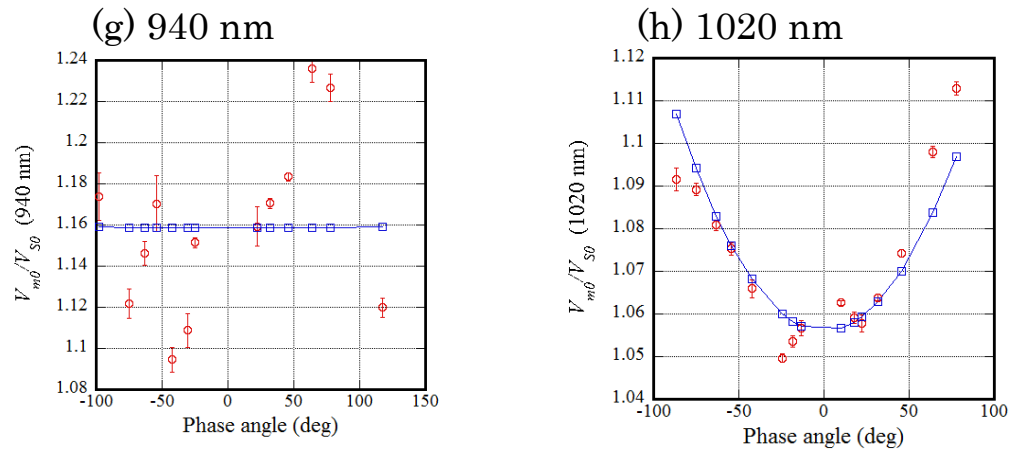

Fig. 5 Relationship between phase angle and reflectance correction factor  $C = V_{m0}/V_{S0}$  in visible and near-infrared region. A regression curve ( $C = A_c \cdot g^2 + B_c$ ,  $g$  : phase angle) was also plotted.  
to be continued.

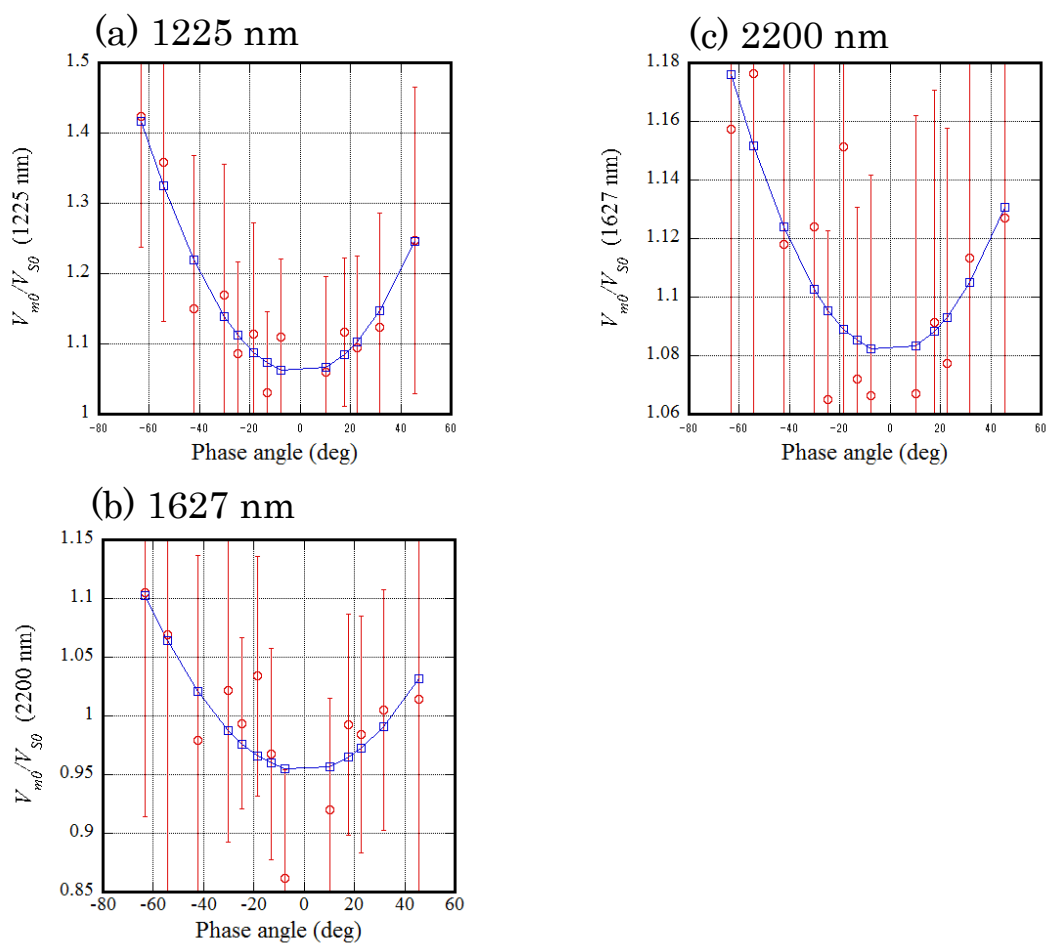

Fig. 6 Relationship between phase angle and reflectance correction factor  $C = V_{m0}/V_{S0}$  in shortwave infrared region. A regression curve ( $C = A_c \cdot g^2 + B_c$ ,  $g$  : Phase angle) was also plotted.



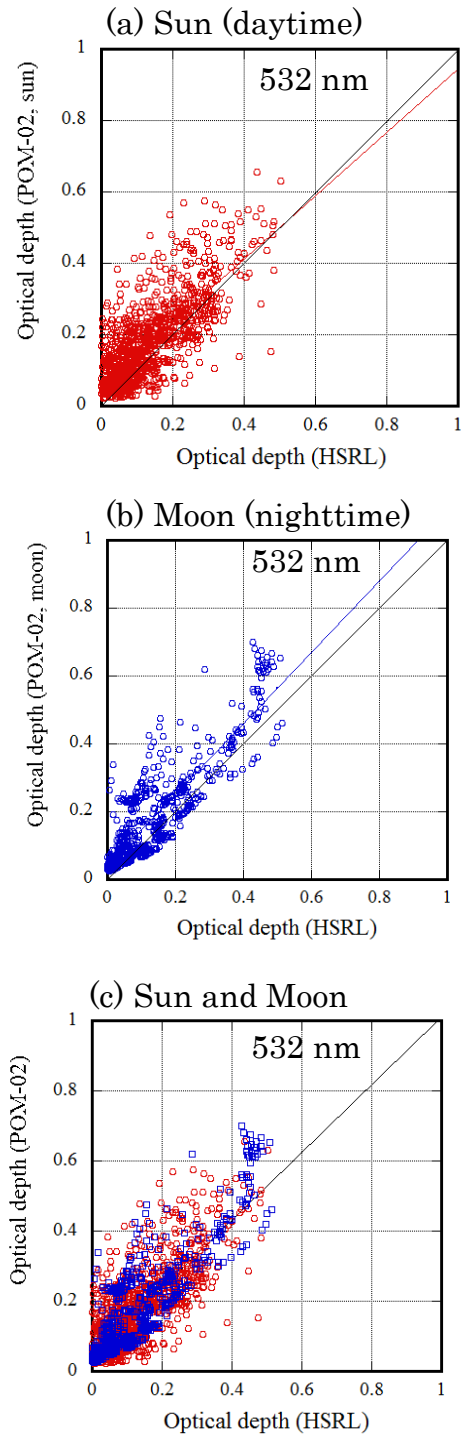

Fig. 7 Scatter plot of NIES/HSRL and POM-02 aerosol optical depth at 532nm. (a) Daytime (red), (b) nighttime (blue), (c) overlapping daytime (red) with nighttime (blue).

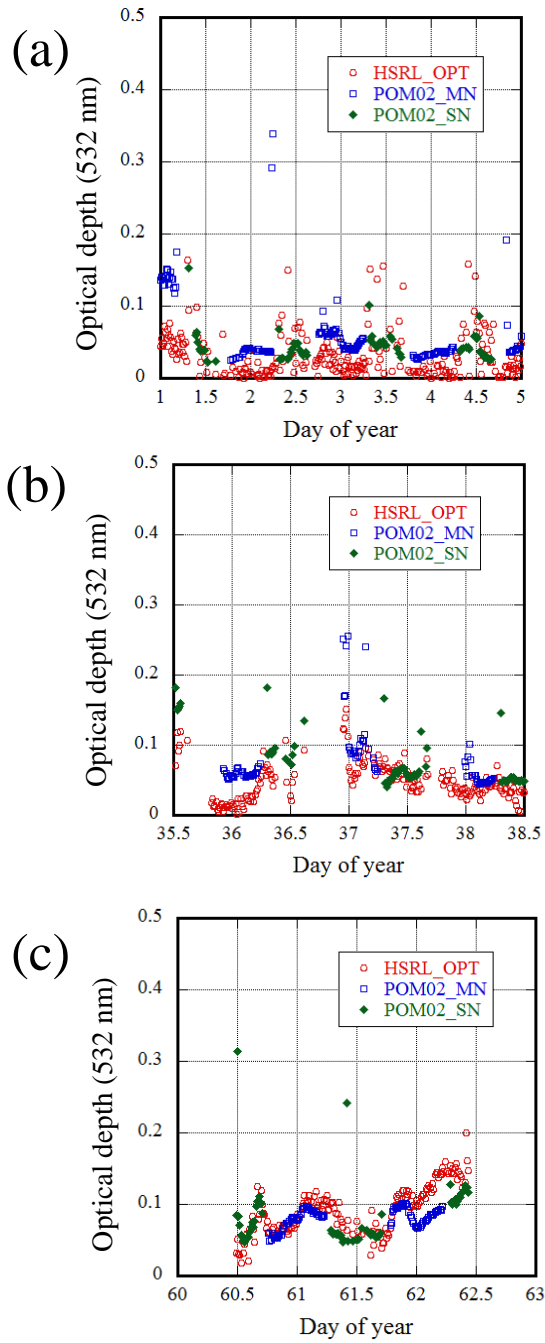

Fig. 8 Examples of time series of NIES/HSRL (red), POM-02 daytime (green), and nighttime (blue) aerosol optical depths at 532 nm. The phase angles ( $g$ ) during the measurement periods were (a)  $g = -21.863$  to  $35.881$  degrees, (b)  $g = 47.454$  to  $83.190$  degrees, and (c)  $g = -19.150$  to  $21.573$  degrees.

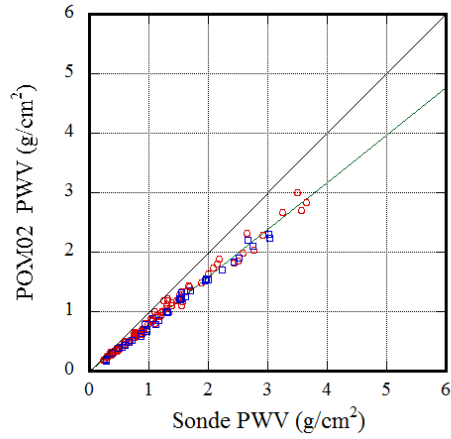

Fig. 9 Scatter plot of radiosonde and POM-02 precipitable water vapor. Daytime (nighttime) measurements are indicated by a red (blue) symbol.

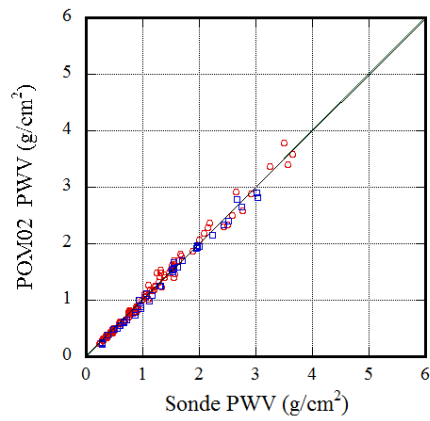

Fig. 10 Same as Fig. 9 except for corrected POM-02 precipitable water vapor.

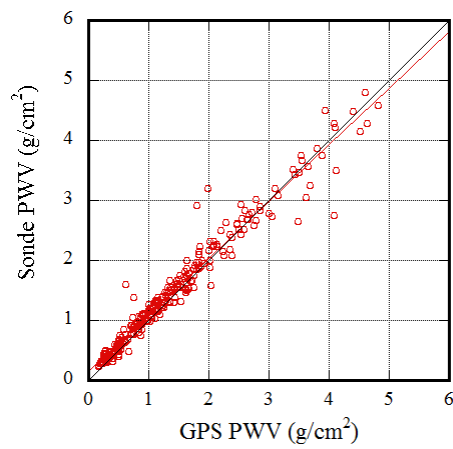

Fig. 11 Scatter plot of GPS and radiosonde precipitable water vapor.

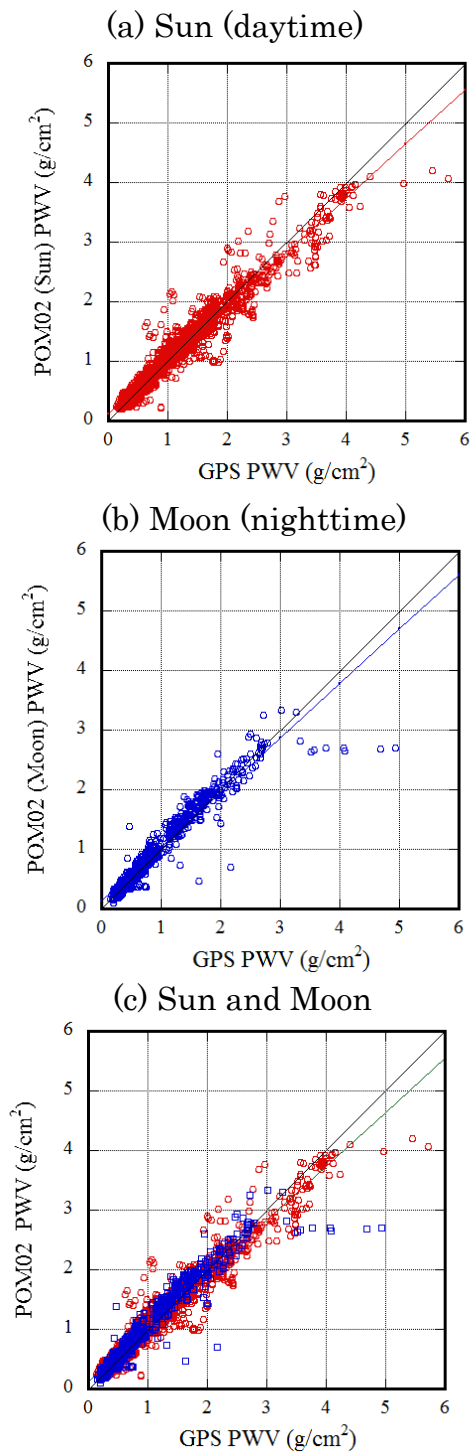

Fig. 12 Scatter plot of PWV from GPS and corrected PWV from POM-02. (a) Daytime (red), (b) nighttime (blue), (c) overlapping daytime (red) with nighttime (blue).

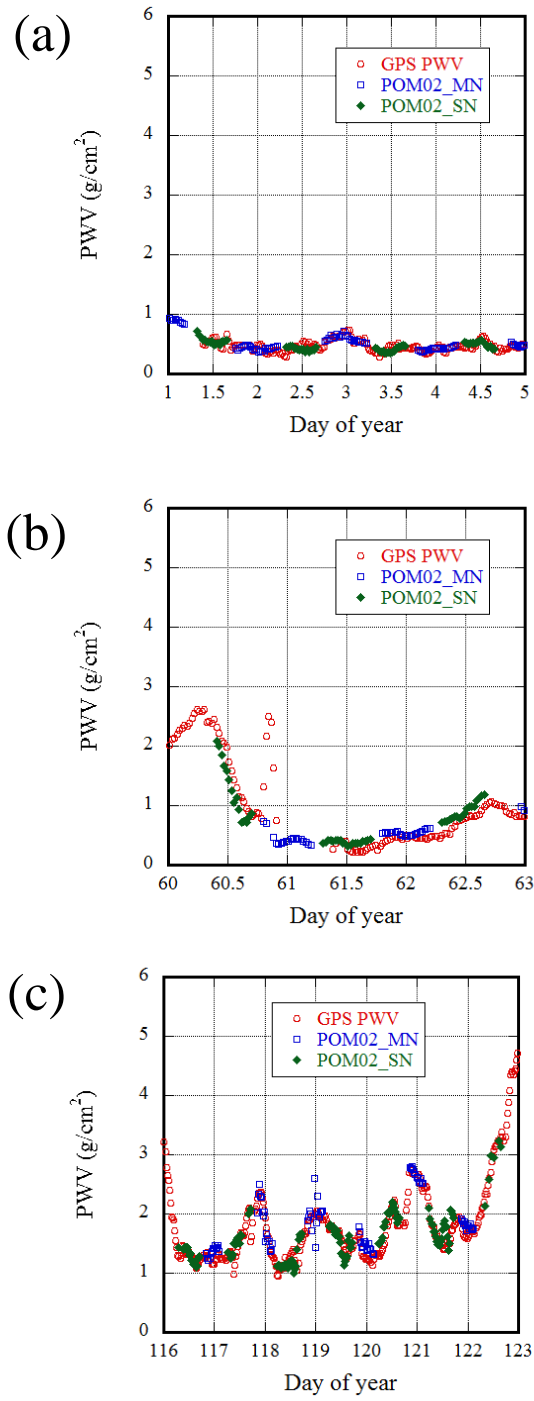

Fig. 13 Examples of time series of GPS (red), POM-02 daytime (green), and nighttime (blue) corrected precipitable water vapor. The phase angles ( $g$ ) during the measurement periods were (a)  $g = -21.863$  to  $35.881$  degrees, (b)  $g = -19.150$  to  $21.573$  degrees, and (c)  $g = -55.145$  to  $30.611$  degrees.

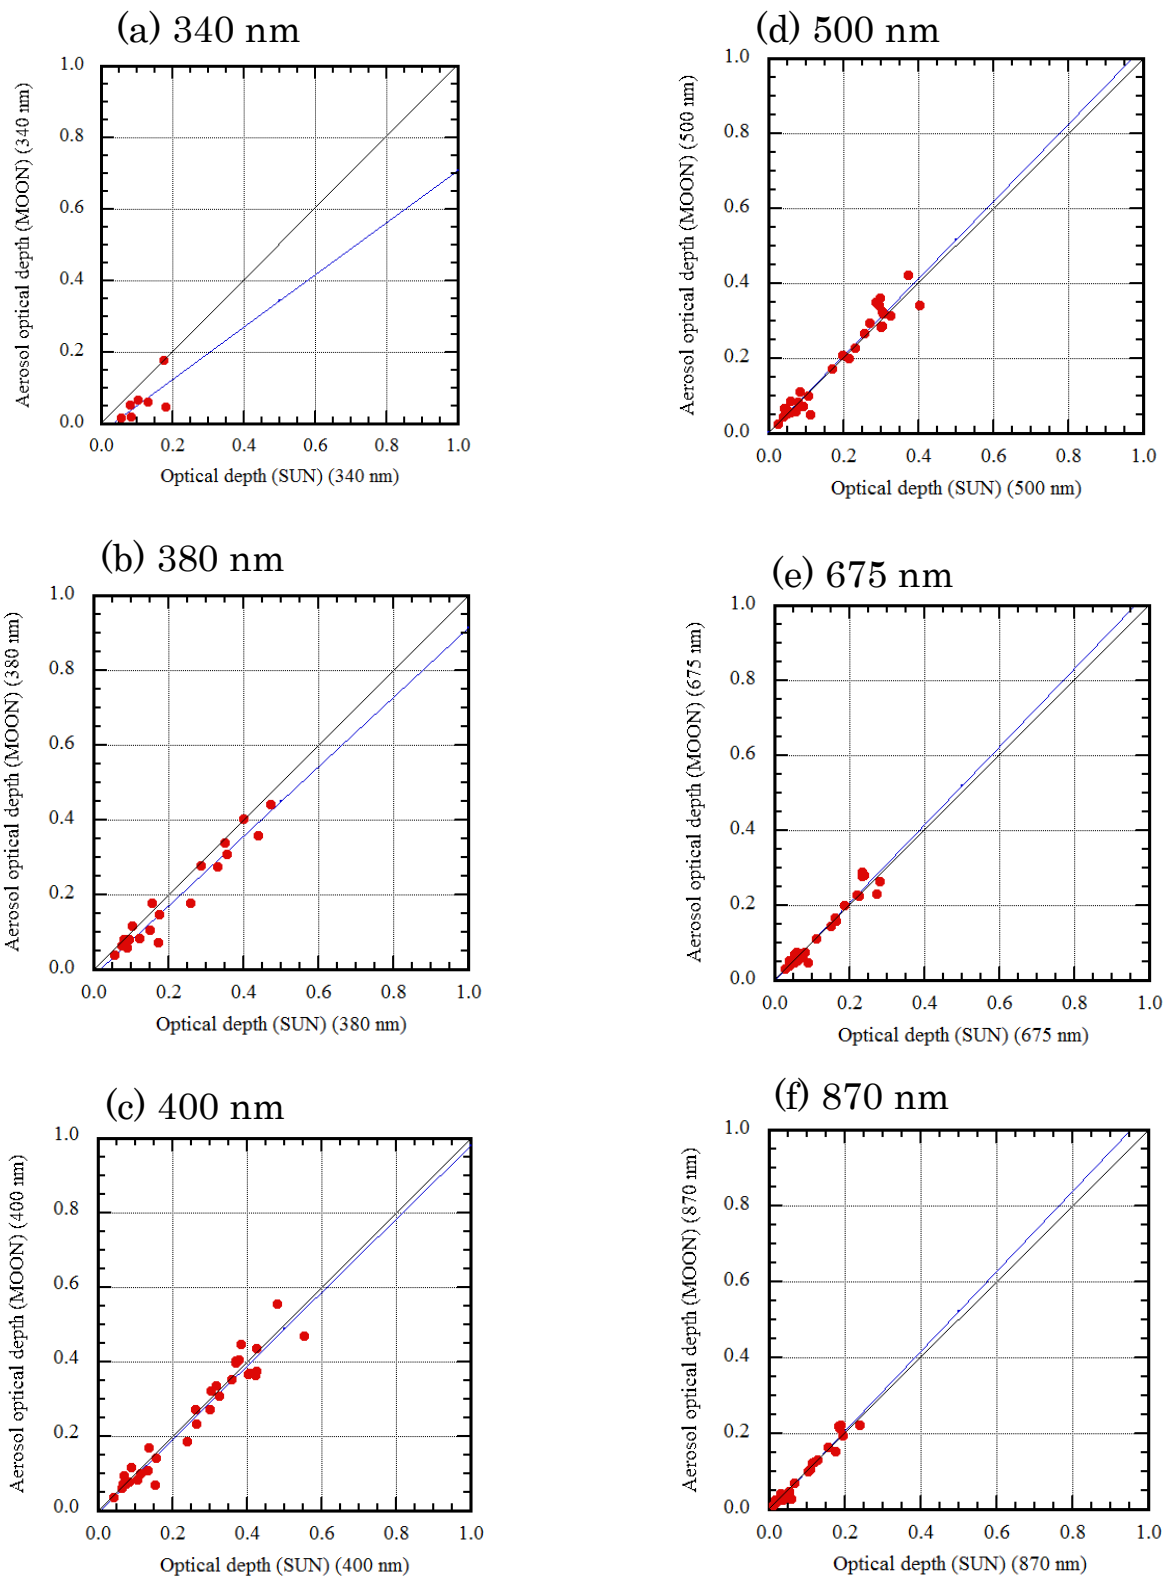

Fig. 14 to be continued.

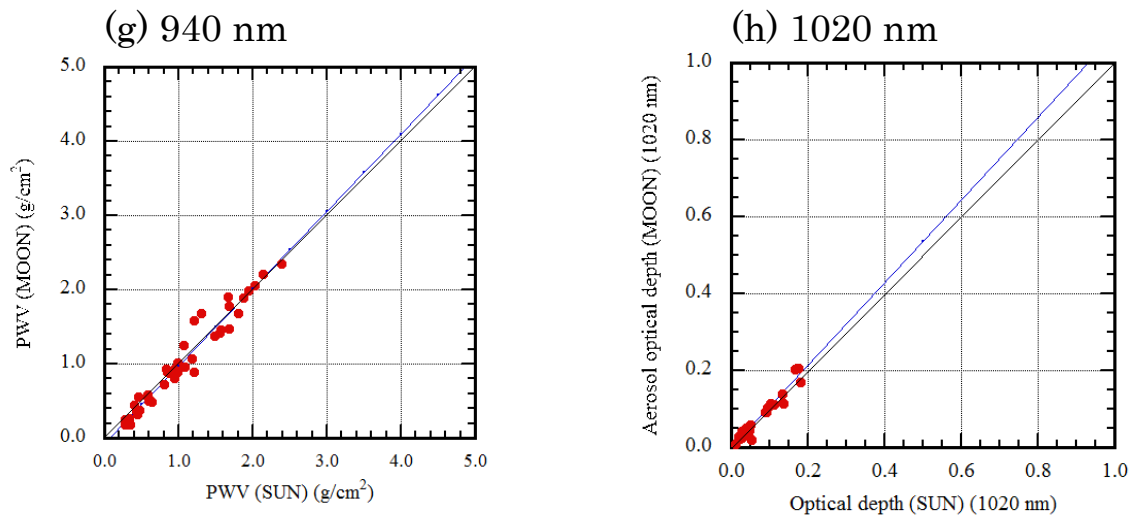

Fig. 14 Scatter plot of the aerosol optical depth (precipitable water vapor) from the sun and the moon. (a) 340 nm AOD, (b) 380 nm AOD, (c) 400 nm AOD, (d) 500 nm AOD, (e) 675 nm AOD, (f) 870 nm AOD, (g) 940nm PWV, (h) 1020 nm AOD.

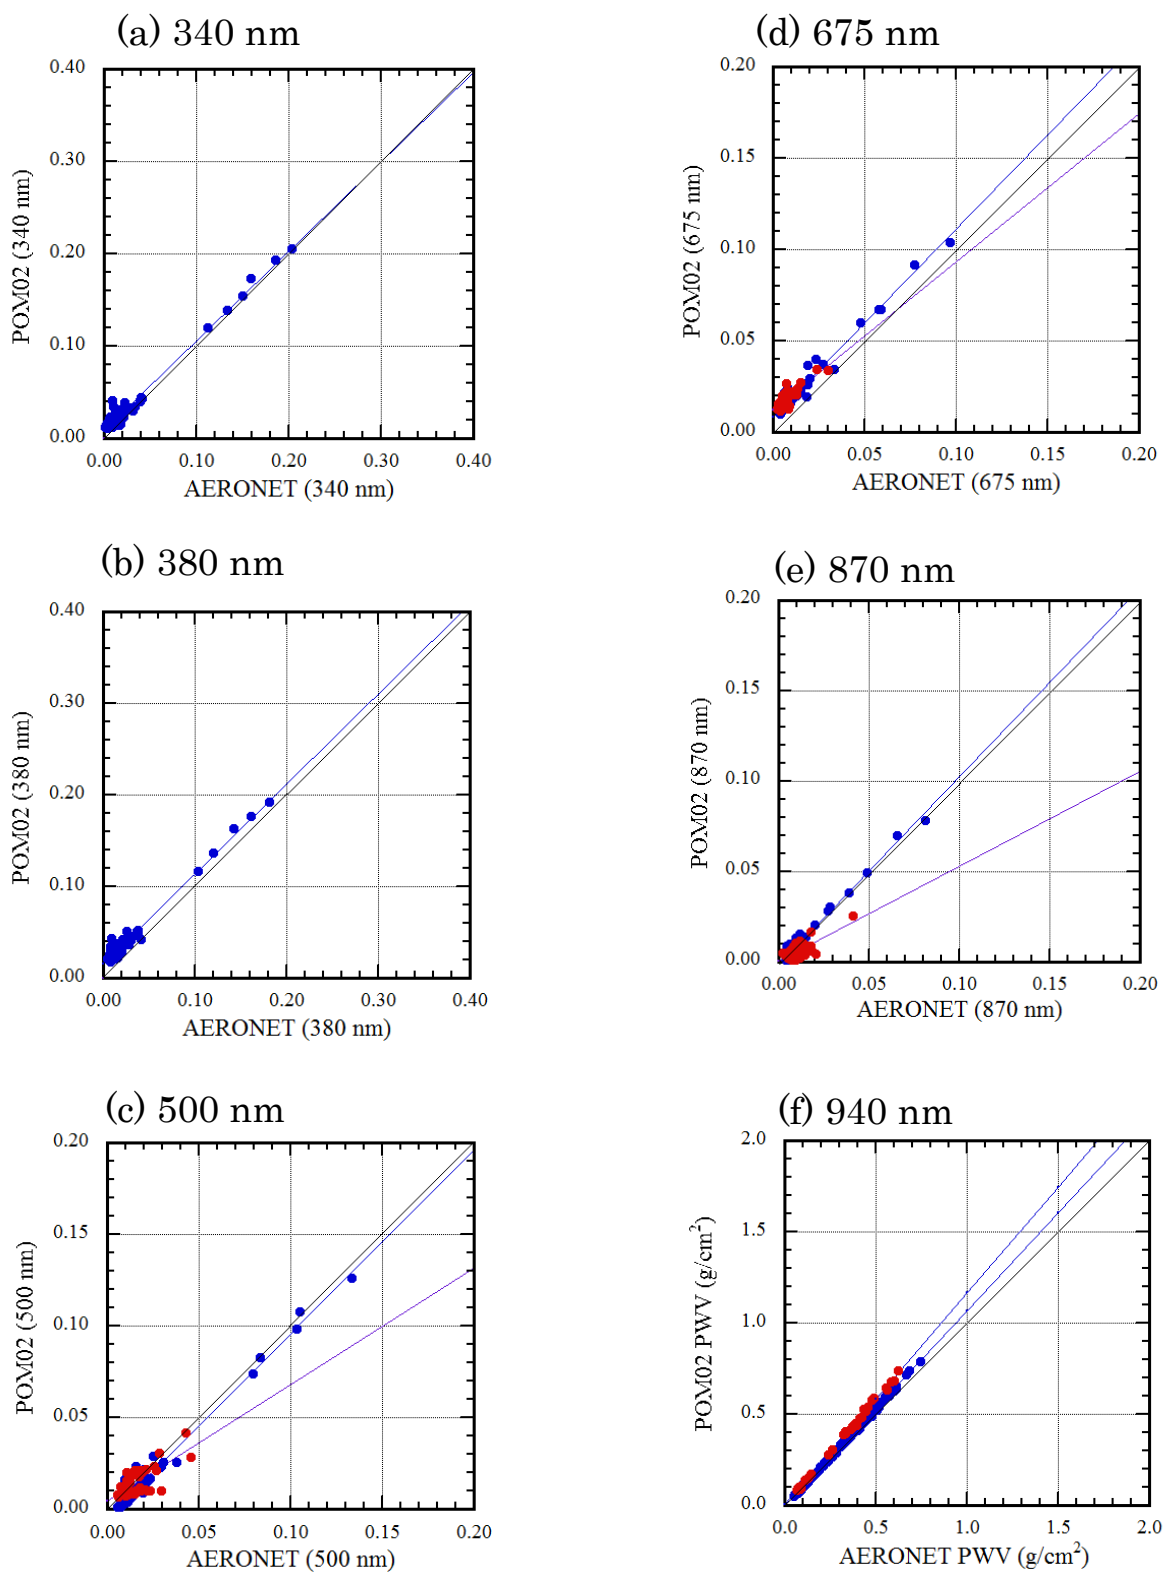

Fig. 15 to be continued.



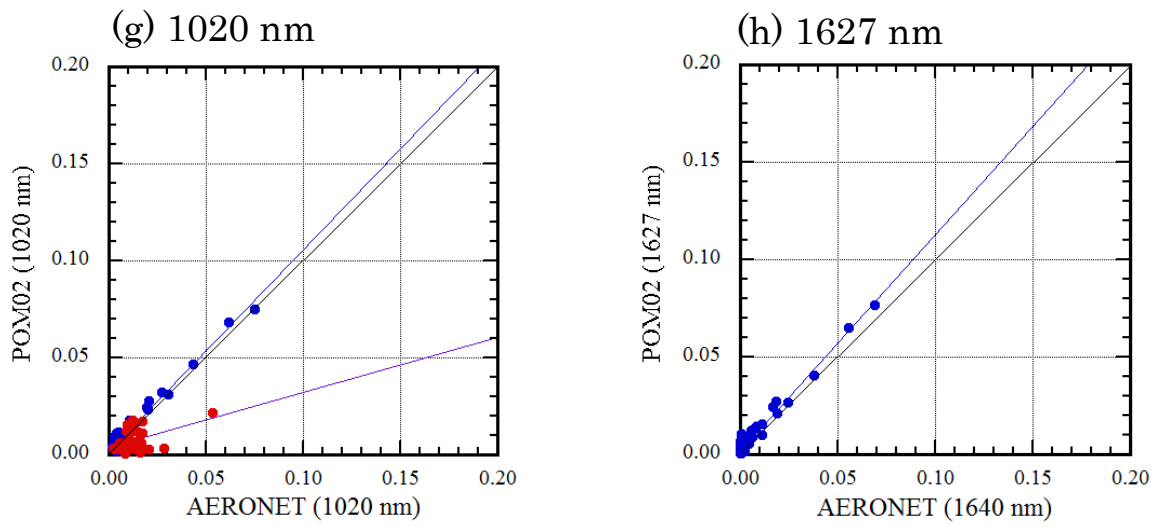

Fig. 15 Scatter plot of AERONET and POM-02 aerosol optical depth (precipitable water vapor). Daytime (nighttime) measurements are indicated by a red (blue) symbol. (a) 340 nm AOD, (b) 380 nm AOD, (c) 500 nm AOD, (d) 675 nm AOD, (e) 870 nm AOD, (f) 940nm PWV, (g)1020nm AOD, (h) 1627 nm AOD.

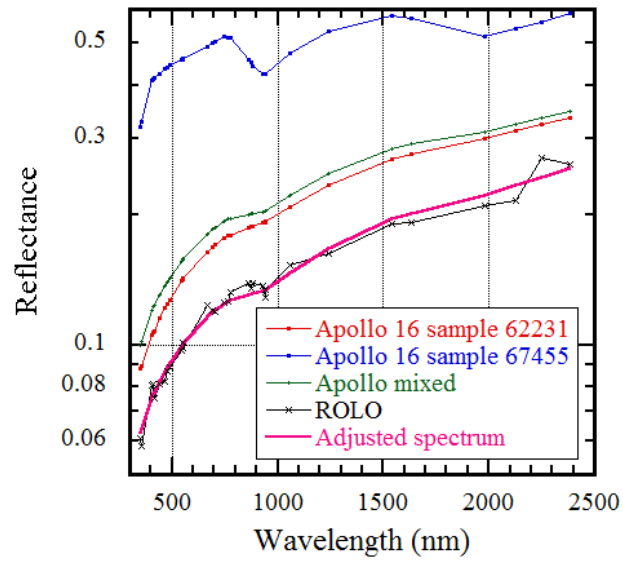

Fig. A1 ROLO smoothed and adjusted reflectance.

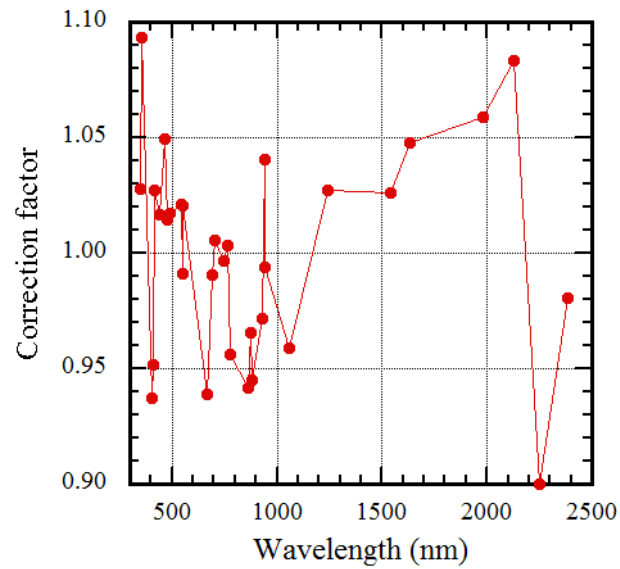

Fig. A2 Coefficients for smoothing at the ROLO 32 wavelength.

## Supplement

The time series of the AOD at 500 nm and PWV at Tsukuba for 5 months are shown in Fig. S1 and Fig. S2, respectively. These are non-cloud screened data.

In addition, the time series of the comparison between HSRL and POM-02 AOD and the time series of the comparison between GPS and POM-02 PWV are shown in Fig. S3 and Fig. S4.

### Figure captions

Fig. S1 Time series of the AOD at 500 nm at Tsukuba for 5 months. (a) January, (b) February, (c) March, (d) April, (e) May.

Fig. S2 Time series of the PWV at Tsukuba for 5 months. (a) January, (b) February, (c) March, (d) April, (e) May.

Fig. S3 Time series of the comparison between HSRL and POM-02 AOD for 5 months. Red symbols are HSRL AOD, blue symbols are AOD in the nighttime, and green symbols are AOD in the daytime. The data are 15-minute averages.

Fig. S4 Time series of the comparison between GPS and POM-02 PWV for 5 months. Red symbols are GPS PWV, blue symbols are PWV in the nighttime, and green symbols are PWV in the daytime. The data are 30-minute averages.

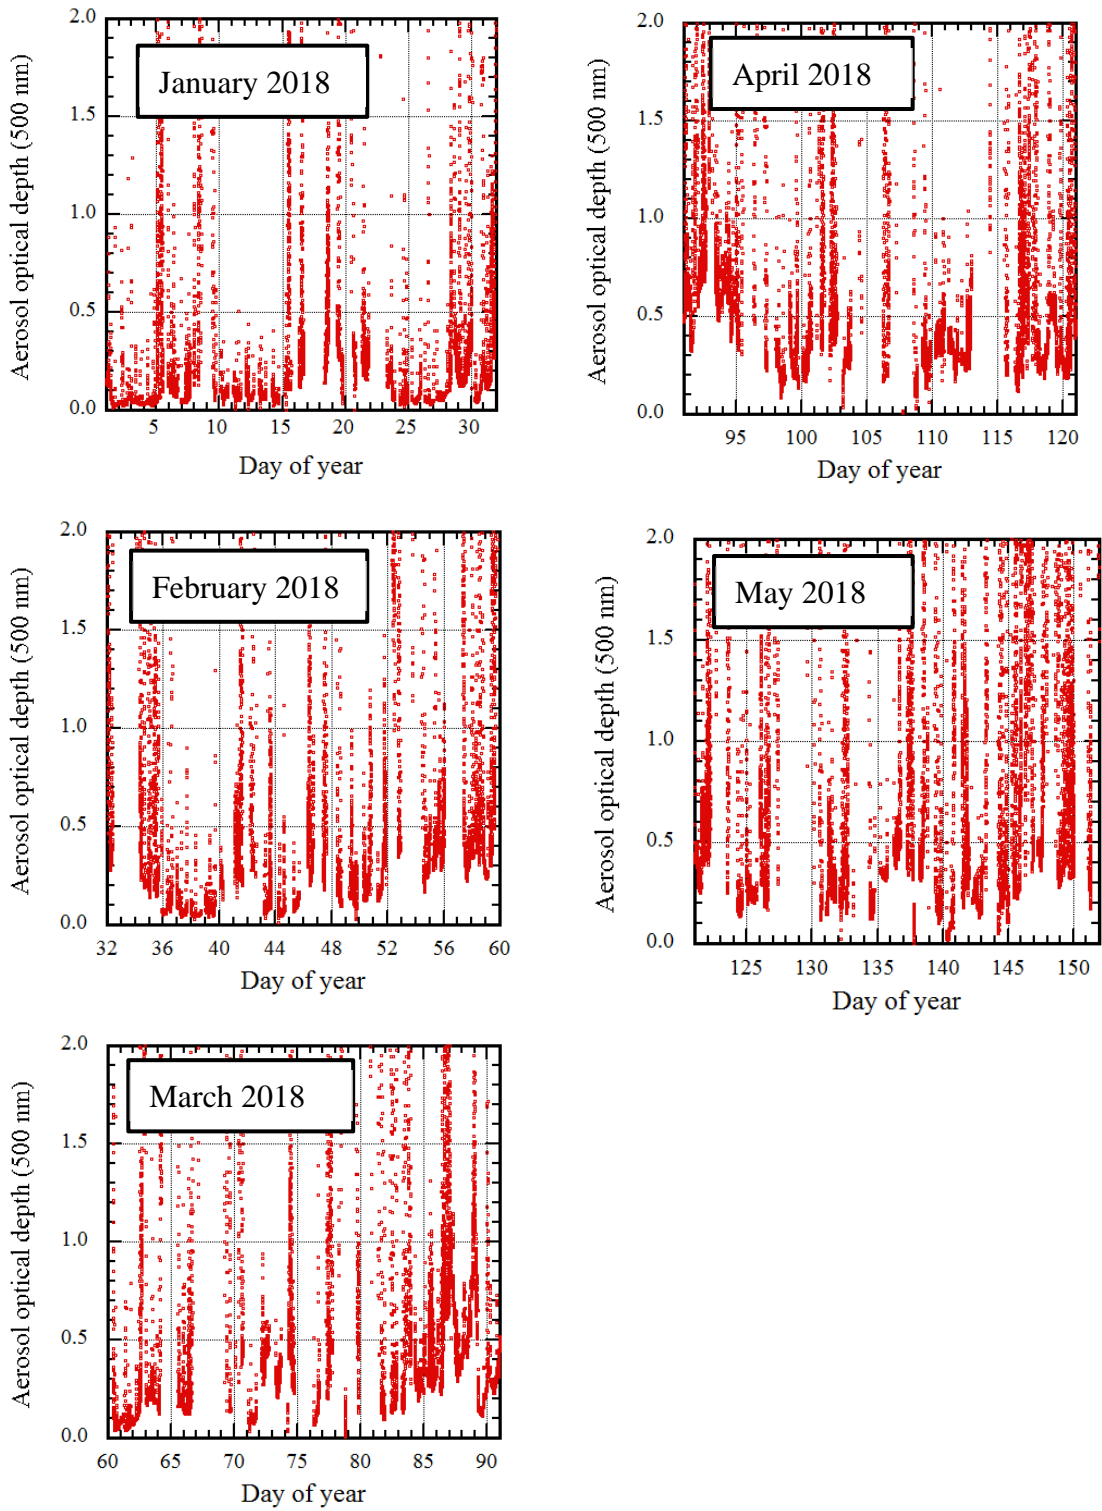

Fig. S1 Time series of the AOD at 500 nm at Tsukuba for 5 months.  
(a) January, (b) February, (c) March, (d) April, (e) May.

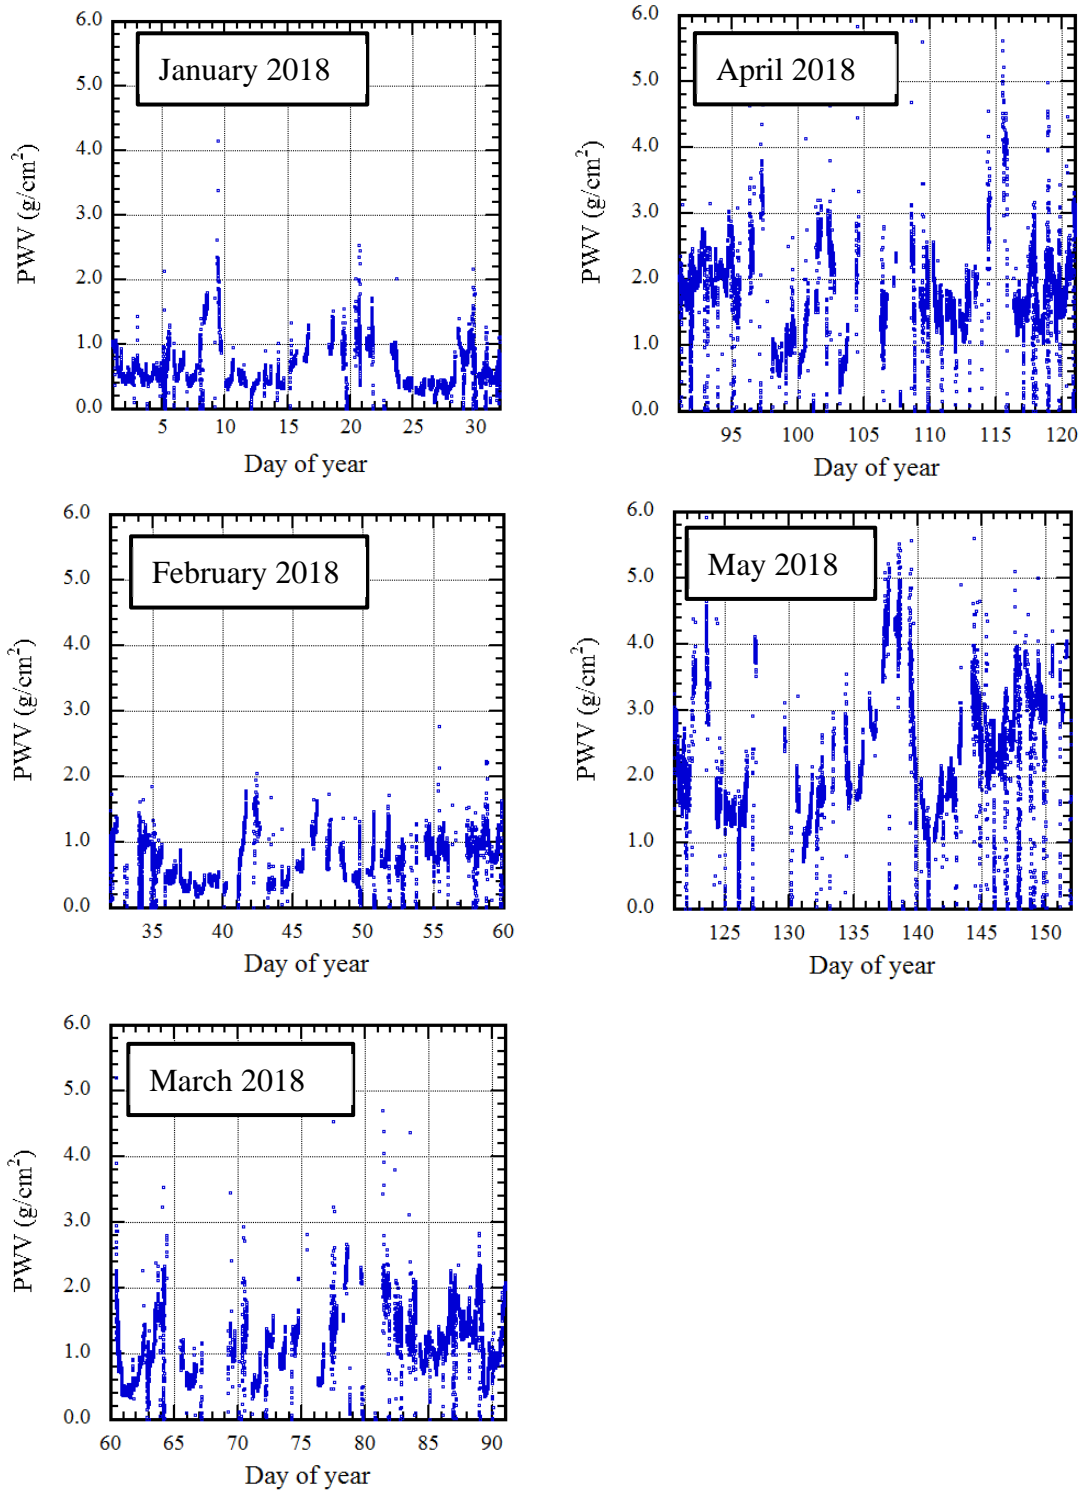

Fig. S2 Time series of the PWV at Tsukuba for 5 months.

(a) January, (b) February, (c) March, (d) April, (e) May.

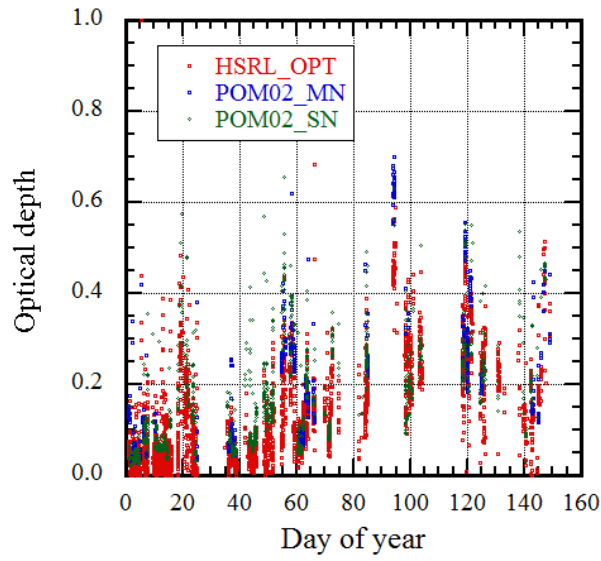

Fig. S3 Time series of the comparison between HSRL and POM-02 AOD. Red symbols are HSRL AOD, blue symbols are AOD in the nighttime, and green symbols are AOD in the daytime. The data are 15-minute averages.

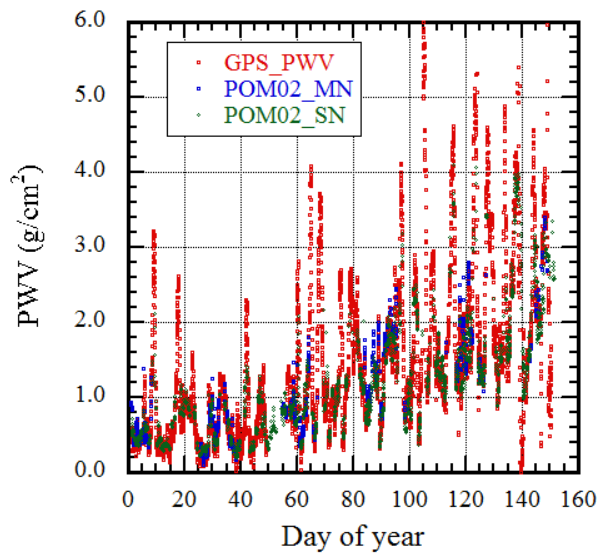

Fig. S4 Time series of the comparison between GPS and POM-02 PWV. Red symbols are GPS PWV, blue symbols are PWV in the nighttime, and green symbols are PWV in the daytime. The data are 30-minutes averages.
